# Supplementary material for: Prevalence of coronary artery calcification in a non-specific chest pain population in emergency and cardiology departments compared with the background population: a prospective cohort study in Southern Denmark with 12-month follow-up of cardiac endpoints
Source: PubMed Central journal article supplement — BMJ Open. 2018 Mar 3;8(3):e018391. doi: 10.1136/bmjopen-2017-018391 (PMC5855253; doi:10.1136/bmjopen-2017-018391), 2018-03-03
Supplement: bmjopen-2017-018391.draft_revisions.pdf [file bmjopen-2017-018391.draft_revisions.pdf]

# BMJ Open

BMJ Open is committed to open peer review. As part of this commitment we make the peer review history of every article we publish publicly available.

When an article is published we post the peer reviewers' comments and the authors' responses online. We also post the versions of the paper that were used during peer review. These are the versions that the peer review comments apply to.

The versions of the paper that follow are the versions that were submitted during the peer review process. They are not the versions of record or the final published versions. They should not be cited or distributed as the published version of this manuscript.

BMJ Open is an open access journal and the full, final, typeset and author-corrected version of record of the manuscript is available on our site with no access controls, subscription charges or pay-per-view fees (<http://bmjopen.bmj.com>).

If you have any questions on BMJ Open's open peer review process please email [info.bmjopen@bmj.com](mailto:info.bmjopen@bmj.com)

# BMJ Open

## Non contrast cardiac CT scan as a risk stratification tool in non-specific chest pain patients

|                                 |                                                                                                                                                                                                                                                                                                                                                                                                                                                                                                                                                                                                                                                                                                                                                                                                              |
|---------------------------------|--------------------------------------------------------------------------------------------------------------------------------------------------------------------------------------------------------------------------------------------------------------------------------------------------------------------------------------------------------------------------------------------------------------------------------------------------------------------------------------------------------------------------------------------------------------------------------------------------------------------------------------------------------------------------------------------------------------------------------------------------------------------------------------------------------------|
| Journal:                        | <i>BMJ Open</i>                                                                                                                                                                                                                                                                                                                                                                                                                                                                                                                                                                                                                                                                                                                                                                                              |
| Manuscript ID                   | bmjopen-2017-018391                                                                                                                                                                                                                                                                                                                                                                                                                                                                                                                                                                                                                                                                                                                                                                                          |
| Article Type:                   | Research                                                                                                                                                                                                                                                                                                                                                                                                                                                                                                                                                                                                                                                                                                                                                                                                     |
| Date Submitted by the Author:   | 27-Jun-2017                                                                                                                                                                                                                                                                                                                                                                                                                                                                                                                                                                                                                                                                                                                                                                                                  |
| Complete List of Authors:       | Ilangkovan, Nivethitha; Hospital of Southern Denmark, Department of Cardiology<br>Mogensen, Christian; Hospital of Southern Denmark, Emergency Department<br>Mickley, Hans; Odense Universitetshospital, Cardiology<br>Lassen, Annmarie; Odense University Hospital, Department of Emergency Medicine<br>Lambrechtsen, Jess; Odense University Hospital, Department of Medicine<br>Sand, Niels Peter; SVS, Department of Cardiology<br>Albiniussen, Rasmus; Hospital of Southern Denmark, Department of Cardiology<br>Byg, Jorgen; Hospital of Southern Denmark, Department of Cardiology<br>Hald, Flemming; Vejle Hospital, Department of cardiology<br>Sørensen, Mette; Odense Universitetshospital, Department of cardiology<br>Diederichsen, Axel; Odense Universitetshospital, Department of Cardiology |
| <b>Primary Subject Heading</b>: | Cardiovascular medicine                                                                                                                                                                                                                                                                                                                                                                                                                                                                                                                                                                                                                                                                                                                                                                                      |
| Secondary Subject Heading:      | Emergency medicine, Diagnostics                                                                                                                                                                                                                                                                                                                                                                                                                                                                                                                                                                                                                                                                                                                                                                              |
| Keywords:                       | Coronary heart disease < CARDIOLOGY, Coronary intervention < CARDIOLOGY, Ischaemic heart disease < CARDIOLOGY, Myocardial infarction < CARDIOLOGY, Cardiovascular imaging < RADIOLOGY & IMAGING, Computed tomography < RADIOLOGY & IMAGING                                                                                                                                                                                                                                                                                                                                                                                                                                                                                                                                                                   |
|                                 |                                                                                                                                                                                                                                                                                                                                                                                                                                                                                                                                                                                                                                                                                                                                                                                                              |

SCHOLARONE™  
Manuscripts

## Non contrast cardiac CT scan as a risk stratification tool in non-specific chest pain patients

Nivethitha Ilangkovan<sup>1</sup>, Christian Backer Mogensen<sup>2</sup>, Hans Mickley<sup>3</sup>, Annmarie Lassen<sup>4</sup>, Jess Lambrechtsen<sup>5</sup>, Niels Peter Sand<sup>6</sup>, Rasmus Albiniussen<sup>1</sup>, Jørgen Byg<sup>1</sup>, Flemming Hald<sup>7</sup>, Mette Hjortdal Grønhøj<sup>3</sup>, Axel Diederichsen<sup>3</sup>

1. Cardiology Department, Hospital of Southern Jutland, Aabenraa, Denmark.
2. Emergency Department, Hospital of Southern Denmark, Aabenraa, Denmark.
3. Cardiology Department, Odense University Hospital, Odense, Denmark.
4. Emergency Department, Odense University Hospital, Odense, Denmark.
5. Medical Department, Svendborg Hospital, Svendborg, Denmark.
6. Cardiology Department, Esbjerg Hospital, Esbjerg, Denmark.
7. Cardiology Department, Vejle Hospital, Vejle, Denmark.

### Corresponding author

Nivethitha Ilangkovan

Email: [nilangkovan@gmail.com](mailto:nilangkovan@gmail.com)

Phone number: 0045-22787820

Address: Kresten Philipsens vej 15, 6200 Aabenraa

Word count: 3925

### Abstract

**Objectives:** To examine the prevalence of coronary artery calcification and frequency of cardiac events in a cohort of non-specific chest pain (NSCP) patients (an acute admission for chest pain and discharged without an obvious reason for the chest pain) and compare with the background population.

**Design:** A double blinded prospective cohort study examined with non-contrast CT scan and measurement of the CAC score.

**Setting:** Departments of Emergency and Cardiology in the Southern Region of Denmark.

**Subjects:** The study population consists of 229 NSCP patients and was compared with 722 patients from the background population. The patients were included from September 2014 until June 2015 and followed for a year.

**Main outcomes measures:** Prevalence of CAC. Cardiac related mortality, acute myocardial infarction, unstable angina and coronary revascularisation.

**Results:** No significant difference in prevalence of CAC was found. During one year follow-up two (0.9%) NSCP patients were revascularised, while no one died experienced MI, VT or had UAP. In the background population four (0.6%) experienced a clinical endpoint; one cardiac related death, two with MI, one had VT.

**Conclusion:** The prevalence of CAC is comparable with the background population, and the prognosis for NSCP patients during one year follow up is excellent.

1  
2  
3  
4 Keywords: Coronary heart disease, ischemic heart disease, myocardial infarction, cardiovascular  
5 imaging, computed tomography.  
6  
7

#### 8 9 Strength and limitation

- 10 • Patients included from multiple centers
- 11 • Outcome data from well documented and validated registers
- 12 • Selected patient cohort and age
- 13 • Definitions of risk factors differed between the cohort
- 14 • Data gathering differed for the main study population and the background population for  
15 comparison.  
16  
17  
18  
19  
20  
21  
22

#### 23 Introduction

24  
25 Cardio vascular disease (CVD) remains a major public health problem and causes half of all deaths in  
26 Europe, while coronary artery disease (CAD) accounts for 20% of all deaths in Europe(1). One of five  
27 patients with chest pain in the emergency departments turns out to fulfill the diagnostic criteria of acute  
28 myocardial infarction (MI) (2, 3). Other causes of acute chest pain may be of cardiovascular origin  
29 (aneurism, aortic dissection pulmonary embolism), but can also be non-cardiac related (gastrointestinal  
30 disorders, musculoskeletal disorders) while a significant number of patients the cause of symptoms remains  
31 unknown, and these patients are defined as having non-Specific Chest Pain (NSCP).  
32  
33

34 However, even if acute MI is definitely excluded, CAD may be present with an inherent risk of future cardiac  
35 events. Hence, 0.8% of NSCP patients experienced an adverse outcome during 30 days follows up after  
36 discharge from an emergency department (4). It has been shown that up to 20% of patients with CAD do  
37 not have any traditional risk factors such as hypertension, hyperlipidemia, diabetes or smoking (5), thus a  
38 non-contrast cardiac CT might serve as a tool in risk stratification by measuring the presence and extent of  
39 coronary artery calcification (CAC). The advantages of non-contrast cardiac CT are that the method is easy  
40 to perform and interpret, the reproducibility is high and the radiation exposure is low (3, 6-8). The role of a  
41 non-contrast cardiac CT as a risk stratification tool has been established in asymptomatic persons (9) . The  
42 prevalence of CAC in an asymptomatic general population without known prior CVD has been shown to be  
43 44%-50% (10, 11). The Multi-Ethnic Study of Atherosclerosis (MESA) demonstrated that an increased CAC  
44 score was associated with a higher risk of CAD during a 10 year follow up period (12). However, the clinical  
45 importance of CAC in patients with acute chest pain, in whom an acute MI has been ruled out, remains to  
46 be investigated.  
47  
48  
49  
50  
51  
52  
53  
54  
55  
56  
57

1  
2  
3  
4 In order to evaluate the non-contrast cardiac CT as a potential risk stratification tool for patients with NSCP  
5 the aim of the present study was twofold. First, we wanted to investigate the prevalence of CAC among  
6 NSCP patients and to compare the findings with observations from an asymptomatic background  
7 population. Second, we wished to examine the frequency of clinical cardiac events related to CAC in NSCP  
8 patients during a 12 months follow-up period, and compare these data with the results from the  
9 asymptomatic background population but also those directly referred for a further cardiac test from index  
10 contact.  
11  
12  
13  
14  
15

## 16 17 **Method and materials**

### 18 19 **Study design**

20 This study was a double blinded prospective cohort study including patients from the Emergency and  
21 Cardiology Departments in the region of Southern Denmark. All patients with an acute visit for chest pain  
22 to the hospitals in Odense, Svendborg, Vejle, Kolding, Aabenraa or Sonderborg, and at least one troponin  
23 measurement during the contact were included. The inclusion period was from September 2014 until May  
24 2015. The patients were invited for this study, if they were discharged without any obvious reason for the  
25 chest pain (NSCP diagnosis (ICD codes: DR072/DR073/DR034/DR035)).  
26  
27  
28  
29  
30

### 31 32 **Study population**

33 Through the central biochemical laboratory for all hospitals in the region of Southern Denmark all patients  
34 with measurement of troponin in the Emergency and Cardiology Departments were identified on a daily  
35 basis. Electronic patient files were scrutinized in all patients with normal troponin values, as defined below.  
36 Patients had to complete a structured questionnaire by a telephone interview within three days of  
37 discharge from the index admission.  
38  
39  
40

41 Afterwards written information and a consent form for participation was sent to the patient. Patients who  
42 returned the consent form were scheduled for the CT scan. The participant and the physicians were blinded  
43 for the result of the non-contrast CT.  
44

45 The inclusion and exclusion criteria for the study is defined below  
46  
47  
48

#### 49 *Inclusion criteria:*

- 50 • Normal troponin (troponin T <14 ng/mL or troponin I < 30 ng/mL)
  - 51 • Age 30-70 years
- 52  
53  
54  
55  
56  
57  
58  
59  
60

- Known with one risk factor for CAD (hypertension, hypercholesterolemia, familiar disposition, and diabetes mellitus, present or former smoker).

*Exclusions criteria:*

- Living outside the catchment area of Region of Southern Denmark
- Refusing participation in the telephone interview and or CT scan
- Percutaneous coronary intervention (PCI) or coronary artery bypass grafting (CABG) and cardiac imaging test within the last 5 years
- Not Danish speaking,

We used the Danish Risk Score study (DanRisk) population (11) as a control group representing the background population. The DanRisk study population consisted of 1 257 asymptomatic subjects aged 50 and 60 years old, who in 2009 had been examined in one of four cardiac CT centers (Odense, Esbjerg, Vejle or Svendborg) in the region of Southern Denmark. The inclusion criteria in this study were at least one risk factor for CAD (hypertension, hypercholesterolemia, familiar disposition, known smoker and diabetes mellitus), and exclusion criteria were known CAD. Patients missing CAC were excluded. The patient selection procedure used in the DanRisk study is described in details elsewhere (11).

### **Definitions**

In the NSCP population comorbidity was self-reported. Diabetes Mellitus was defined as the use of antidiabetic medication or a diagnosis given by their general practitioner. Hypertension and hypercholesterolemia were present if the patients stated to be in relevant medical treatment or had received the diagnoses by the general practitioner. Family history was defined as a first degree relative with CVD without consideration of age. Smoking was defined as current smoker. Systolic and diastolic blood pressure and heart rate were retrieved from the patient files, as the first measured value during the index admission. Cholesterol values were collected up to 3 months before and 3 months after the index admission. The value closest to the index date was used. BMI was calculated based on self-reported height and weight.

For the DanRisk subjects in this study Diabetes Mellitus was defined as use of antidiabetic medication that included any oral antidiabetic drug and/or insulin. Hypertension was defined as the use of antihypertensive medical treatment. Antihypertensive therapy included angiotensin-converting enzyme inhibitors, angiotensin-receptor antagonist, calcium channel blockers, diuretics, beta-blockers, alpha-blockers, and centrally active antihypertensive drugs. Hypercholesterolemia was defined as use of lipid lowering

1  
2  
3  
4 medication. Family history was defined as first degree relative with CAD, male <55 years and female <65  
5 years. Smoking was defined as current smoker. Blood pressure, heart rate, BMI and cholesterol values were  
6 measured at baseline examination.  
7  
8  
9

### 10 **Troponins**

11 The troponin assays used for this study were high sensitive troponins with a 99<sup>th</sup> percentile upper reference  
12 limit.  
13

14 The cardiac troponin I, used by Odense University Hospital, was analyzed by use of the Abbot Diagnostics  
15 architect with an upper reference limit of 99<sup>th</sup> percentile of 25 ng/L and a coefficient of variation < 10% at 5  
16 ng/L. The decision limit for MI was set at  $\geq 25$  ng/L  
17  
18

19 Troponin T, used by all other participating hospitals, was analysed by Roche diagnostic elecsys 2010,  
20 modular analytics E170, Cobas e411, cobas e601. The 99<sup>th</sup> percentile upper reference limit was 14 ng/L and  
21 a coefficient variation <10% at 13 ng/L. The decision limit was set > 14 ng/L for MI.  
22  
23  
24  
25

### 26 **Cardiac CT protocol**

27 CAC was assessed by summing the scores from all foci in the coronary arteries and expressed in Agatston  
28 unit (AU)(reference til Agatston Score). CAC was assessed by trained radiographers, and reanalyzed by the  
29 first author. The correlation was 99%.  
30  
31

32 Two centers used dual-source CT scanner (SOMATOM Definition Flash, Siemens Healthcare, Forchheim,  
33 Germany) with prospective ECG triggering. In persons with heart rate <75 beats/minute the ECG triggering  
34 was set in diastolic phase at 65-75% of the cardiac R-R interval. In persons with heart rate  $\geq 75$  beats/min  
35 the ECG triggering was set in systolic phase at 250-400 ms. Additional settings: slice thickness 3 mm,  
36 collimation 128 x 0.6 mm, gantry rotation time 0.28ms, 120 kV tube voltage, 90mAs/rotation. One center  
37 used a GE 64-slice CT-scanner (Discovery 750 HD; GE Healthcare). In persons with heart rate <75  
38 beats/minute the ECG triggering was set in diastolic phase at 75% of the cardiac R-R interval. In persons  
39 with heartrate  $\geq 75$  beats/min the ECG triggering was set in systolic phase at 40% of the cardiac R-R interval.  
40 Additional settings: slice thickness 2.5 mm, collimation 64 x 0.625 mm, gantry rotation time 0.35ms, 120 kV  
41 tube voltage and 200 mA tube current. The last center used a Toshiba Aquillion Next Generation CT scanner  
42 with prospective ECG triggering. If heart rate was <75 bpm the ECG triggering was in the diastole phase  
43 at 65%-75% of the R-R interval. In persons with heart rates  $\geq 75$  beats/min the ECG triggering was set in  
44 systolic phase at 40%. Slice Thickness was 0.5 mm, collimation after scan range 0.5 mm x 240 – 320, gantry  
45 rotation time 0.275 ms and 120 kV tube voltage.  
46  
47  
48  
49  
50  
51  
52  
53  
54  
55  
56  
57  
58  
59  
60

### Follow-up

The study was conducted as a double blinded study with a 12 month follow-up time. Neither the participants nor the investigators knew the results of the CAC score before the end of follow up. By then the participants and their general practitioner received a letter with the results of the CAC score.

The clinical endpoints in the follow-up study were cardiac death, ventricular tachycardia (VT), non-fatal MI, coronary revascularization and unstable angina. The endpoints were compared with DanRisk participants. Furthermore we did a comparison with NSCP patients who were referred for cardiac imaging testing at the index admission and thus did not participate in our study. These patients were referred for further diagnostic testing by the physician on call that evaluated these patients to have a higher risk of CAD.

### Sample size

A sample size calculation was performed based on the prevalence of elevated CAC score (CAC>0 AU), and we knew that 44% of the general population represented by DanRisk had coronary calcifications (CAC>0 AU)(11). In a symptomatic population referred for coronary angiography 79% had a CAC>0 AU (13). We assumed in a symptomatic low risk population, the NSCP group, 62% would have CAC>0 AU. Confidence interval was set to 95%, and with an expected power of 80% using the Fleiss method gave us a sample size of 238 patients.

### Statistical analyses

Categorical variables were presented with frequency tables and percentages, and continuous variables with mean and medians. Fishers exact test and Chi square test were used for categorical variables. The t-test was used for comparison of normally distributed variables, while the Wilcoxon's rank sum test was used for not normally distributed continuous variables. Odds ratio was calculated with multi-logistic regression.

Exclusion analyses (table 1) were performed between participants and non-participants. Non-participants were those who fulfilled the eligibility criteria but were not recruited. The variables were categorical variables and interferences was estimated with Fishers exact and chi square test. Age was non-parametric and reported with medians and interferences estimated with Wilcoxon's ranksum test.

Descriptive characteristics of the DanRisk and the NSCP patients (table 2) comprised categorical and continuous variable. The characteristics were reported with frequency and means. Statistics estimates were conducted with Fishers exact test and Chi square test for categorical and t-test for continuous variables.

The amount of CAC and its association with risk factors were reported with medians for each risk factor in NSCP patients and the DanRisk patients (table 3). P values estimates are based on Wilcoxon's ranksum test.



1  
2  
3  
4 Comparison between coronary calcification (CAC>0 AU) in NSCP patients and the DanRisk population was  
5 performed with 2x2 tables and Chi square test, and the relationship between calcification in the NSCP and  
6 DanRisk patients adjusted for risk factors that were significant in table 2. Statistics were calculated by  
7 multivariate logistic regression on coronary calcification status (CAC=0 AU vs CAC >0 AU). The analyses  
8 were performed with STATA 14. A P-value <0.05 was considered to be significant.  
9

### 12 **Ethics**

14 The protocol was approved by the Regional Scientific Ethical Committee for Southern Denmark (S-  
15 20140055) and conducted in accordance with the Declaration of Helsinki. The study was registered in  
16 Clinical trial with number NCT02422316. The study was registered with The Danish Data Protection Agency  
17 (2008-58-0035 nr 1092). Written informed consent was obtained from each participant.  
18

20 The DanRisk protocol was approved by the Regional Scientific Ethical Committee for Southern Denmark (S-  
21 20080140) and was conducted in accordance with the Declaration of Helsinki. Written informed consent  
22 was obtained from each participant.  
23  
24

### 27 **Results**

29 In total 4 289 patients aged 30 to 70 years old attended an Emergency or Cardiology Department and had  
30 at least one a troponin measurement done. After exclusion of 3 047 patients (i.e. elevated troponin,  
31 identified cause of the chest pain, no consent, see Figure 1), 1 241 were left for study eligibility. However,  
32 further 800 of these for different reasons (i.e. no risk factors, referred for coronary imaging) had to be  
33 excluded from participation in a cardiac CT scan examination. Of the remaining 441 patients with NSCP 229  
34 patients (participants) accepted the invitation, and to undergo cardiac CT scan, while 212 patients (non-  
35 participants) either declined the invitation or did not show up at the time of cardiac CT-scan. The non-  
36 participants represented individuals that were eligible but not recruited. The mean age was 52 (IQR 44;60)  
37 and 57 (IQR 50;64) years in participants and in non-participants, respectively,  $p=0.0.001$ . Significantly more  
38 were known with hypercholesterolemia and a family history of CVD among participants compared to non-  
39 participants. No significant difference was found in gender, diabetes, hypertension or smoking status. Table  
40 1 lists the comparison between participants and non-participants.  
41  
42  
43  
44  
45  
46  
47  
48  
49  
50  
51  
52  
53  
54  
55  
56  
57  
58  
59  
60

Table 1 : Participants and non-participants comparison

| Characteristics        | Participants |    | Non-participants |    | P-value* |
|------------------------|--------------|----|------------------|----|----------|
|                        | n=229        | %  | n=212            | %  |          |
| Median Age (years/IQR) | 57(50-64)    |    | 52 (44-60)       |    | 0.001    |
| Male                   | 98           | 43 | 89               | 42 | 0.863    |
| Diabetes mellitus      | 22           | 10 | 10               | 5  | 0.048    |
| Hypertension           | 91           | 40 | 70               | 33 | 0.143    |
| Hypercholesterolemia   | 97           | 42 | 67               | 32 | 0.020    |
| Family history         | 124          | 54 | 93               | 44 | 0.031    |
| Smoking                | 58           | 25 | 57               | 27 | 0.709    |

P values compares the proportions of participants and non-participants that are known with the specific variable

Figure 1: Flowchart for the inclusion of the NSCP population/ Figure 2: Flow chart for DanRisk

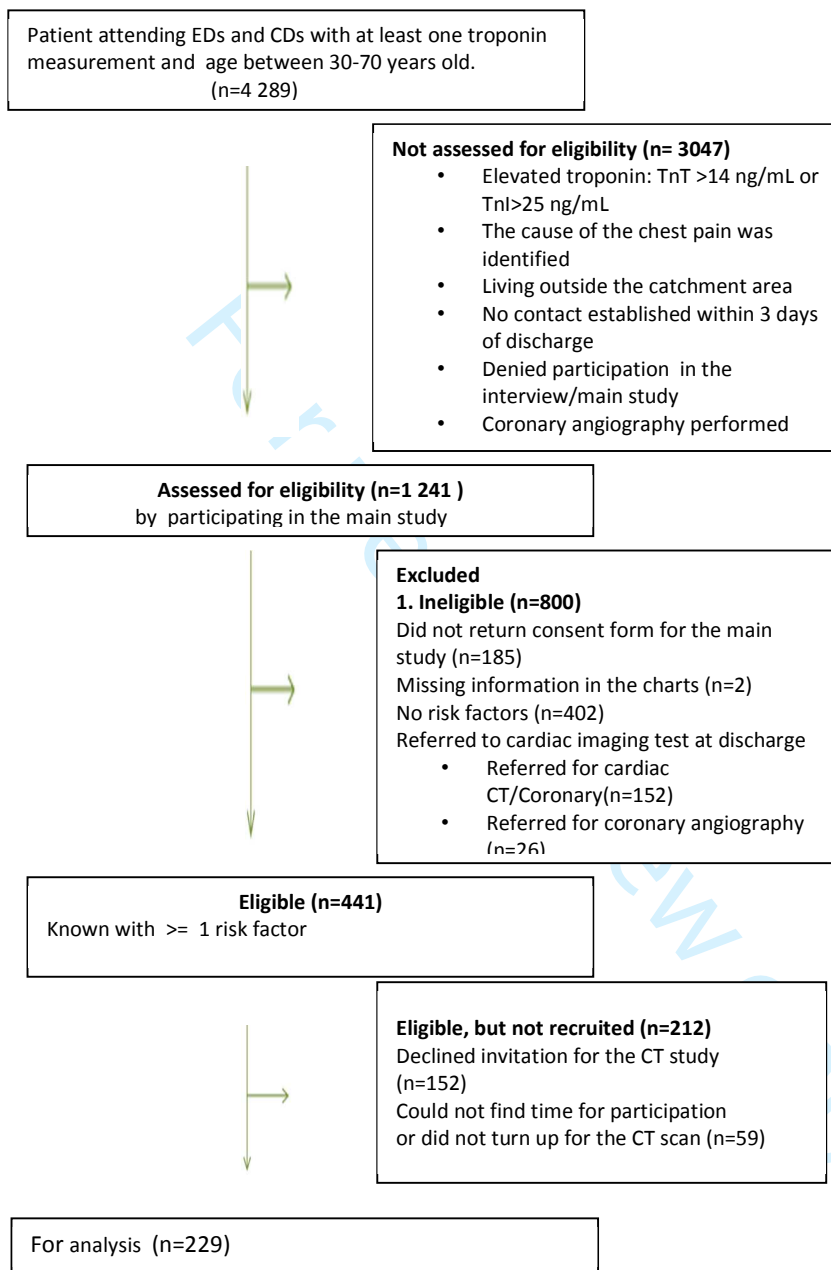

Figure 2 shows the inclusion of the patients in the DanRisk study. 1 825 random individuals 50 or 60 years old were invited for study participation. 1 257 accepted the invitation. In total 535 patients were excluded, 6 did not have a CAC score performed, 16 patients were known with CAD, and 513 did not fulfill the criteria of having at least one risk factor. In total 722 persons from the Danrisk study served as controls for NSCP patients.

Figure 2

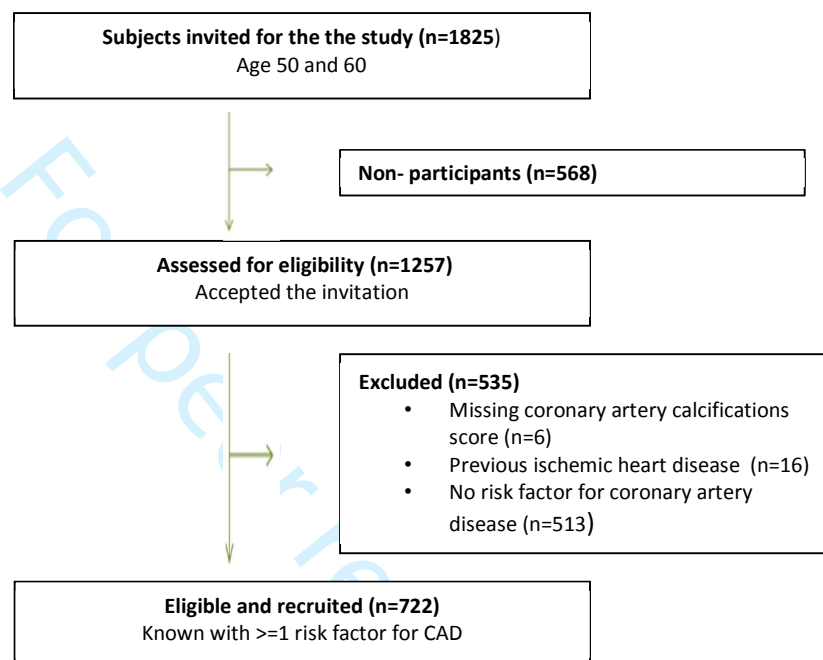

Table 2 lists the baseline characteristics for the NSCP patients and the DanRisk cohort. Mean age for the NSCP population was 57 years and 55 years for DanRisk patients ( $p=0.007$ ). A significantly higher proportion of NSCP patients had known hypercholesterolemia and family history of IHD, while more participants in DanRisk were smoking. Furthermore, a significant difference between the populations regarding blood pressure, heart rate and total cholesterol was found.

Table 2: Descriptive characteristics of NSCP and background population.

|                                 | NSCP population |    | Background population |    | P-value* |
|---------------------------------|-----------------|----|-----------------------|----|----------|
|                                 | n=229           | %  | n=722                 | %  |          |
|                                 |                 |    |                       |    | 0.476    |
| Female                          | 131             | 57 | 327                   | 55 |          |
| Male                            | 98              | 43 | 295                   | 45 |          |
| Age                             |                 |    |                       |    | 0.001    |
| 30-39                           | 7               | 3  | -                     |    |          |
| 40-49                           | 46              | 20 | -                     |    |          |
| 50-59                           | 76              | 33 | 316                   | 44 |          |
| 60-70                           | 100             | 44 | 406                   | 56 |          |
| Hospital                        |                 |    |                       |    | 0.001    |
| Odense                          | 70              | 31 | 175                   | 24 |          |
| Vejle                           | 63              | 27 | 171                   | 24 |          |
| Aabenraa                        | 58              | 25 | -                     | -  |          |
| Svendborg                       | 38              | 17 | 180                   | 25 |          |
| Esbjerg                         | -               | -  | 196                   | 27 |          |
| Hypertension                    | 91              | 40 | 266                   | 37 | 0.458    |
| Hypercholesterolemia            | 97              | 42 | 126                   | 18 | 0.001    |
| Diabetes                        | 22              | 10 | 59                    | 8  | 0.509    |
| Family history                  | 124             | 54 | 287                   | 40 | 0.001    |
| Smoking                         | 58              | 25 | 314                   | 44 | 0.001    |
|                                 | Mean            |    | Mean                  |    |          |
| Systolic blood pressure (mmHg)  | 144             |    | 137                   |    | 0.001    |
| Diastolic blood pressure (mmHg) | 97              |    | 83                    |    | 0.002    |
| Pulse (rate/min)                | 74              |    | 71                    |    | 0.001    |
| Total cholesterol mmol/L        | 5.2             |    | 5.5                   |    | 0.005    |
| LDL cholesterol mmol/L          | 3.1             |    | 3.2                   |    | 0.067    |
| HDL cholesterol mmol/L          | 1.4             |    | 1.5                   |    | 0.088    |
| BMI (kg/m <sup>2</sup> )        | 27              |    | 27                    |    | 0.715    |

\*P values estimates for comparison of mean values.

The median CAC scores for each variable are listed in the Table 3. A significant difference was found between patients  $\geq 60$  years in the NSCP population and the 60 years old asymptomatic patients in the DanRisk cohort. Patients with hypertension in the NSCP population also had significantly more CAC than hypertensive DanRisk patients.

Table 3: Median CAC estimates based on characteristics variable

|                         | NSCP<br>Median CAC (IQR)<br>AU | Background population<br>Median CAC (IQR)<br>AU | P-value* |
|-------------------------|--------------------------------|-------------------------------------------------|----------|
| Female                  | 0(0;67)                        | 0(0;18)                                         | 0.736    |
| Male                    | 18(0;83)                       | 9(0;116)                                        | 0.117    |
| Age                     |                                |                                                 |          |
| 30-39                   | 0(0;1)                         |                                                 |          |
| 40-49                   | 0(0;5)                         |                                                 |          |
| 50-59                   | 0(0;33)                        | 0(0;12.5)                                       | 0.247    |
| 60-70                   | 47(0;147)                      | 7(0;110)                                        | 0.008    |
| Hospital                |                                |                                                 |          |
| Odense                  | 0(0;26)                        | 1(0;69)                                         | 0.019    |
| Vejle                   | 8(0;104)                       | 4(0;28)                                         | 0.109    |
| Aabenraa                | 10(0;120)                      | -                                               | -        |
| Svendborg               | 16(0;65)                       | 0(0;61)                                         | 0.083    |
| Esbjerg                 | -                              | 0(0;66)                                         | -        |
| Hypertension            | 30(0;251)                      | 4(0;96)                                         | 0.022    |
| Hypercholesterolemia    | 6(0;94)                        | 14(0;127)                                       | 0.878    |
| Diabetes                | 61(0;253)                      | 11(0;129)                                       | 0.251    |
| Familiar history of CVD | 3(0;72)                        | 1(0;36)                                         | 0.198    |
| Smoking                 | 4(0;133)                       | 5(0;73)                                         | 0.607    |

\* P value compares median value of CAC (AU) between NSCP and background population.  
AU=Agatston unit

The prevalence of CAC score >0 was 54 % in the NSCP population and 52 % in the DanRisk cohort (p=0.605).

When adjusted for sex, age, hypercholesterolemia, smoking status and family history in a multilogistic regression analysis no significant difference was found between the presences of CAC in the NSCP population vs the DanRisk cohort (Odds ratio (OR) 1.3 (95%: 0.9-1.9), p=0.126).

During one year follow-up 2 out of 229 (0.9%) NSCP patients were revascularized, while no one died from cardiac related causes, or had a MI, VT or UAP. The two patients with events were a female aged 64 and a male aged 60 years with a CAC score of 349 and 2595, respectively. Both were known with hypertension, hypercholesterolemia and a family history of CVD. Fishers exact test showed no statistically difference in

endpoints  $p=0.636$  between NSCP and DanRisk. The event rate in the DanRisk population was 4 /722 (0.6%) one cardiac related death, two had MI, and one had VT. All four patients were males. The patient with VT was 50 years, and had a CAC=0, but also a family history of CVD. The three other persons in the DanRisk cohort were 60 years old with a CAC score of 166, 832 and 1326 respectively. One was a smoker, one had hypertension and hypercholesterolemia, while the last was smoking, had diabetes and a family history of CVD

Table 4 : The distribution of CAC and endpoints for NSCP and background population.

|                       | Total |              | CAC=0 AU |              | CAC>0 AU  |                  |
|-----------------------|-------|--------------|----------|--------------|-----------|------------------|
|                       | n     | %(CI)        | n        | %(CI)        | n         | %(CI)            |
| NSCP                  | 2/229 | 0.9(0.2-2.9) | 0/106    | 0(0.0-3.0)   | 2/12<br>3 | 1.6(0.3-<br>5.3) |
| Background population | 4/722 | 0.6(0.2-1.3) | 1/350    | 0.3(0.1-1.4) | 3/37<br>2 | 0.8(0.2-<br>2.2) |

Table 4 shows how the clinical endpoints are associated with prevalence of CAC. No significant difference was found between the numbers of endpoints related to CAC between the groups.

211 patients were referred for further work up from the index contact and not included in this study. 152 went through a cardiac CT, 26 were referred for coronary angiography and 33 for myocardial perfusion scintigraphy. The combined clinical endpoints in this study were 11/211 (5.2%). Two patients had UAP, two had MI and 9 had coronary revascularization performed during one year of follow-up. No one had VT or died from cardiac related causes. Table 5 shows the the event rate in those referred directly for cardiac testing is significantly higher compared to the background population and to the NSCP group.

Table 5: number of events in the patients referred directly for cardiac testing, the study population and Background population.

|           | Referred for cardiac testing | Study population | Background population |
|-----------|------------------------------|------------------|-----------------------|
| number(n) | 211                          | 229              | 722                   |
| event (n) | 11                           | 2                | 4                     |
| %         | 5.2                          | 0.9              | 0.6                   |
| CI %      | 2.8-8.9                      | 0.1-2.9          | 0.2-1.3               |

## Discussion

This is the first study to our knowledge to evaluate the role of non-contrast CT in a NSCP population.

We showed that CAC can be detected in roughly half of patients with NSCP, and the occurrence does not differ significantly from what can be found in the general population. Furthermore, the CAC prevalence and prognosis for NSCP patients does not differ from the prognosis in the asymptomatic background population. However comparing NSCP patients and background population with those referred for cardiac investigation at index contact showed the latter to have a significant higher rate of clinical events. Our study demonstrated that results of non-contrast cardiac CT in NSCP patients does not differ from the general population, and we thus do not consider the results of this examination as a potential stratification tool for NSCP patients compared to use of cardiac CT in the background population. The use of cardiac CT scan for CAC appears to be of limited value in the setting of patients with NSCP, and will in the worst case scenario lead to more downstream test utilization.

Laudon et al. (14) showed that in non-cardiac chest pain patients presenting to the ED and fulfilling the criteria for UAP, the prevalence of CAC was 49%, which is consistent with our findings in NSCP patients. Non-cardiac chest pain patients, all though excluded for MI, comprise a heterogeneous group and also include patients with other causes of chest pain than cardiac related. In Laudon's study non-cardiac chest pain patients with a CAC=0 had a 5 year probability of event free survival of 100%. This was significantly better than the cardiac related chest pain group, implying that a non-contrast CT scan may be useful in the discrimination between non-cardiac related and cardiac related chest pain. However, the study by Laudon et al included patients fulfilling the criteria for unstable angina, who were scanned during index contact, which makes their patient population a higher risk than our patients. NSCP patients in our study were scanned after discharge and exclusion for high risk patients that were referred for further investigation at index contact

The Society of Cardiovascular Computed Tomography Guidelines recommends (15) that patients in the emergency department with acute chest pain, a negative ECG, normal biomarkers and low to intermediate pretest likelihood by risk stratification and in whom a non-coronary cause of the chest pain has been excluded, should be referred for a coronary CT angiography. In the present study we found that patients referred for early further work up, had a one-year event rate of 5 %, as oppose to the approximately 1 % demonstrated in NSCP patients, who from a clinical point of view did not require additional early diagnostic work up. Thus, the current clinical assessment when it comes to risk stratification to distinguish the patients who need further investigations from the NSCP patients seems to be efficient. The differences in



1  
2  
3  
4 characteristics between those referred for further investigations and those included in our study (without  
5 referral at index contact) is however not further elucidated in this study.

6  
7 It is not possible to conclude on the prognostic value of CAC in predicting adverse cardiac event due to the  
8 low number of event in our study, the short follow up time and small number of participants. However the  
9 two patients in the NSCP study population experiencing a clinical event had a high CAC score, respectively  
10 349 and 2595, and were known with three risk factors for CVD (hypertension, hypercholesterolemia and a  
11 family history of CVD). This may suggest a benefit from combining traditional risk factors with the presence  
12 of severe CAC. In concordance with previous studies that found a pooled event rate of 0.3-0.6%/year with  
13 CAC=0, the risk of cardiac events is very low when CAC=0 (16). In the NSCP population no events among  
14 patients with a CAC=0 was observed, while one person in DanRisk with CAC=0 experienced VT.  
15  
16  
17  
18  
19  
20

21 The NSCP population comprised more patients with hypercholesterolemia vs DanRisk (43% vs 18%). We  
22 know from previous studies that NSCP is associated with more frequent contacts to the health care system  
23 and use of medication than the background population (17). This could partially explain that more patients  
24 in this group could have been diagnosed with hypercholesterolemia. However, the higher prevalence of  
25 CAC in the NSCP population might be explained by more patients having hypercholesterolemia compared  
26 to the DanRisk population. The effect of statins on coronary calcification has also demonstrated conflicting  
27 results with a previous study showing a trend toward increasing atheroma calcification with statin use (18).  
28  
29  
30  
31  
32  
33

### 34 **Strengths /Limitations**

35 The outcome data collected from the Danish registries are well documented and validated, which adds  
36 strength to this study (19, 20). The patients included in this study are low risk patients. It cannot be  
37 excluded that the participating patients included in this study and DanRisk are healthier as it is known that  
38 non-participants in clinical trials are at higher risk and have worse outcomes than participants (21). NSCP  
39 and Background population were preselected and excluded for known CAD and revascularisation or  
40 coronary angiography within the last 5 years, and this excludes the higher risk patients. Conversely, both  
41 NSCP and DanRisk participants had to have one risk factor for CAD to fulfill inclusion criteria excluding very  
42 low risk patients without risk factors. Patients who at index admission were referred for further  
43 investigations were not included in this study. They could have a higher prevalence of CAC which cannot be  
44 accounted for in this study.  
45  
46  
47  
48  
49  
50

51 Age was also a selection criterion in both studies, focusing on 30-70 years old among NSCP patients and 50  
52 and 60 years old in DanRisk. Both studies are most useful in evaluating the middle age patients. However,  
53 we do know that increasing age leads to increasing calcification and the use of CAC in an older population is  
54  
55  
56  
57  
58  
59  
60

1  
2  
3  
4 hence not useful. The low age among both populations in contraire could be a causal explanation for the  
5 few events taking place.

6  
7 The definitions of risk factors were not similar. Family history was limited by age in the DanRisk study while  
8 no age limitation existed in NSCP patients, and that could explain the higher proportion of patients with  
9 family history of CAD among NSCP patients. The data gathering furthermore differed, as NSCP patients  
10 were acutely admitted and values extracted from an acute setting, while DanRisk patients were  
11 investigated in a baseline examination. E.g the blood pressures were not obtained uniformly and thus not  
12 comparable.  
13  
14  
15

### 16 17 18 **Conclusion**

19  
20 Based on the results of this study the occurrence of CAC patients with NSCP does not differ significantly  
21 from what is found in the background population, when adjusted for established risk factors. Thus, a little  
22 more than half of the NSCP patients have detectable CAC on a cardiac CT scan. Of notice, the prognosis in  
23 these patients is excellent with an overall clinical event rate of less than 1%. The results of the present  
24 study indicate that patients at increased risk of future clinical events already are being taken care of during  
25 the index hospital contact.  
26  
27  
28  
29

### 30 31 **Contributorship**

32  
33 The steering committee (NI, HM, AL, AD, CBM) designed the trial. NI and CBM obtained funding. The  
34 investigators (JL, FH, RA, JB, NPS, MHG) trained the staff and gathered data. NI, AD, MGH and CBM analysed  
35 the data. NI, CBM, HM, AL and AD wrote the report. All authors, can take responsibility for the integrity of  
36 the data and the accuracy of the data analysis, contributed to the implementation of the study, data  
37 interpretation and approved the final report for publication.  
38  
39  
40

### 41 42 **Data sharing**

43 No additional data available.  
44  
45

### 46 47 **Conflict of interests**

48  
49 All authors have completed the Unified Competing Interest form at [www.icmje.org/coi\\_disclosure.pdf](http://www.icmje.org/coi_disclosure.pdf)  
50 (available on request from the corresponding author) and declare that (1) no authors have support from  
51 any company for the submitted work. (2) no authors have relationships with companies that might have an  
52 interest in the submitted work in the previous 3 years; (3) their spouses, partners, or children have no  
53  
54  
55  
56  
57

1  
2  
3  
4 financial relationships that may be relevant to the submitted work; and (4) no authors have non-financial  
5 interests that may be relevant to the submitted work.  
6  
7

### 8 **Funding**

9  
10 This study was funded by the Region of southern Denmark, Hospital of Southern Denmark, The University  
11 of Southern Denmark and Knud and Edith Eriksens memory foundation.  
12  
13

### 14 **Acknowledgement**

15  
16 We are indebted to the staff involved in the project at the Department of Cardiology and Nuclear medicine,  
17 Odense University Hospital, the Department of Cardiology, Vejle Hospital, the Department of Cardiology  
18 and Radiology, Svendborg Hospital and the Department of Cardiology, Hospital of Southern Jutland .  
19  
20  
21  
22  
23  
24  
25  
26  
27  
28  
29  
30  
31  
32  
33  
34  
35  
36  
37  
38  
39  
40  
41  
42  
43  
44  
45  
46  
47  
48  
49  
50  
51  
52  
53  
54  
55  
56  
57  
58  
59  
60

## References

1. Nichols M, Townsend N, Scarborough P, Rayner M. Cardiovascular disease in Europe 2014: epidemiological update. *Eur Heart J*. 2014;35(42):2950-9.
2. Mogensen CB, Christiansen M, Jorgensen JB, Staehr PB. Risk model for suspected acute coronary syndrome is of limited value in an emergency department. *Danish medical journal*. 2015;62(10):A5140.
3. Thygesen K, Alpert JS, Jaffe AS, Simoons ML, Chaitman BR, White HD. Third universal definition of myocardial infarction. *Nature reviews Cardiology*. 2012;9(11):620-33.
4. Omstedt A, Hoijer J, Djarv T, Svensson P. Hypertension predicts major adverse cardiac events after discharge from the emergency department with unspecified chest pain. *Eur Heart J Acute Cardiovasc Care*. 2016;5(5):441-8.
5. Khot UN, Khot MB, Bajzer CT, Sapp SK, Ohman EM, Brener SJ, et al. Prevalence of conventional risk factors in patients with coronary heart disease. *Jama*. 2003;290(7):898-904.
6. Agatston AS, Janowitz WR, Hildner FJ, Zusmer NR, Viamonte M, Jr., Detrano R. Quantification of coronary artery calcium using ultrafast computed tomography. *J Am Coll Cardiol*. 1990;15(4):827-32.
7. Messenger B, Li D, Nasir K, Carr JJ, Blankstein R, Budoff MJ. Coronary calcium scans and radiation exposure in the multi-ethnic study of atherosclerosis. *Int J Cardiovasc Imaging*. 2016;32(3):525-9.
8. Montalescot G, Sechtem U, Achenbach S, Andreotti F, Arden C, Budaj A, et al. 2013 ESC guidelines on the management of stable coronary artery disease: the Task Force on the management of stable coronary artery disease of the European Society of Cardiology. *Eur Heart J*. 2013;34(38):2949-3003.
9. Joshi PH, Blaha MJ, Blumenthal RS, Blankstein R, Nasir K. What is the role of calcium scoring in the age of coronary computed tomographic angiography? *Journal of nuclear cardiology : official publication of the American Society of Nuclear Cardiology*. 2012;19(6):1226-35.
10. Budoff MJ, McClelland RL, Nasir K, Greenland P, Kronmal RA, Kondos GT, et al. Cardiovascular events with absent or minimal coronary calcification: the Multi-Ethnic Study of Atherosclerosis (MESA). *Am Heart J*. 2009;158(4):554-61.
11. Diederichsen AC, Sand NP, Norgaard B, Lambrechtsen J, Jensen JM, Munkholm H, et al. Discrepancy between coronary artery calcium score and HeartScore in middle-aged Danes: the DanRisk study. *Eur J Prev Cardiol*. 2012;19(3):558-64.
12. Joshi PH, Patel B, Blaha MJ, Berry JD, Blankstein R, Budoff MJ, et al. Coronary artery Calcium predicts Cardiovascular events in participants with a low lifetime risk of Cardiovascular disease: The Multi-Ethnic Study of Atherosclerosis (MESA). *Atherosclerosis*. 2016;246:367-73.
13. Budoff MJ, Diamond GA, Raggi P, Arad Y, Guerci AD, Callister TQ, et al. Continuous probabilistic prediction of angiographically significant coronary artery disease using electron beam tomography. *Circulation*. 2002;105(15):1791-6.
14. Laudon DA, Behrenbeck TR, Wood CM, Bailey KR, Callahan CM, Breen JF, et al. Computed tomographic coronary artery calcium assessment for evaluating chest pain in the emergency department: long-term outcome of a prospective blind study. *Mayo Clin Proc*. 2010;85(4):314-22.
15. Raff GL, Chinnaiyan KM, Cury RC, Garcia MT, Hecht HS, Hollander JE, et al. SCCT guidelines on the use of coronary computed tomographic angiography for patients presenting with acute chest pain to the emergency department: a report of the Society of Cardiovascular Computed Tomography Guidelines Committee. *Journal of cardiovascular computed tomography*. 2014;8(4):254-71.
16. Chaikriangkrai K, Palamaner Subash Shantha G, Jhun HY, Ungprasert P, Sigurdsson G, Nabi F, et al. Prognostic Value of Coronary Artery Calcium Score in Acute Chest Pain Patients Without Known Coronary Artery Disease: Systematic Review and Meta-analysis. *Annals of emergency medicine*. 2016.
17. Roll M, Rosenqvist M, Sjoborg B, Wettermark B. Unexplained acute chest pain in young adults: disease patterns and medication use 25 years later. *Psychosomatic medicine*. 2015;77(5):567-74.

- 1
- 2
- 3
- 4 18. Puri R, Nicholls SJ, Shao M, Kataoka Y, Uno K, Kapadia SR, et al. Impact of statins on serial
- 5 coronary calcification during atheroma progression and regression. *J Am Coll Cardiol.* 2015;65(13):1273-82.
- 6 19. Lynge E, Sandegaard JL, Rebolj M. The Danish National Patient Register. *Scandinavian journal*
- 7 *of public health.* 2011;39(7 Suppl):30-3.
- 8 20. Pedersen CB. The Danish Civil Registration System. *Scandinavian journal of public health.*
- 9 *2011;39(7 Suppl):22-5.*
- 10 21. Bahit MC, Cannon CP, Antman EM, Murphy SA, Gibson CM, McCabe CH, et al. Direct
- 11 comparison of characteristics, treatment, and outcomes of patients enrolled versus patients not enrolled in
- 12 a clinical trial at centers participating in the TIMI 9 Trial and TIMI 9 Registry. *Am Heart J.* 2003;145(1):109-
- 13 17.
- 14
- 15
- 16
- 17
- 18
- 19
- 20
- 21
- 22
- 23
- 24
- 25
- 26
- 27
- 28
- 29
- 30
- 31
- 32
- 33
- 34
- 35
- 36
- 37
- 38
- 39
- 40
- 41
- 42
- 43
- 44
- 45
- 46
- 47
- 48
- 49
- 50
- 51
- 52
- 53
- 54
- 55
- 56
- 57
- 58
- 59
- 60

For peer review only

1 **ClinicalTrials.gov PRS**  
 2 *Protocol Registration and Results System*

6 ClinicalTrials.gov PRS **DRAFT Receipt (Working Version)**

7 Last Update: 02/16/2016 08:20

9 ClinicalTrials.gov ID: NCT02422316

12 **Study Identification**

13 Unique Protocol ID: SHS-ED-2014-01

15 Brief Title: Non-contrast Cardiac CT as a Risk Stratification Tool in Patients With Non-  
 16 cardiac Chest Pain

18 Official Title:

19 Secondary IDs:

22 **Study Status**

24 Record Verification: February 2016

25 Overall Status: Completed

27 Study Start: September 2014 []

29 Primary Completion: June 2015 [Actual]

30 Study Completion: June 2015 [Actual]

33 **Sponsor/Collaborators**

35 Sponsor: University of Southern Denmark

37 Responsible Party: Principal Investigator

38 Investigator: Christian Backer Mogensen [cmogensen]

39 Official Title: associate professor

40 Affiliation: University of Southern Denmark

41 Collaborators:

44 **Oversight**

46 U.S. FDA-regulated Drug:

48 U.S. FDA-regulated Device:

49 U.S. FDA IND/IDE: No

51 Human Subjects Review: Board Status: Approved

52 Approval Number: S-20140055

53 Board Name: The Regional Scientific Ethical Committees for Southern Denmark

54 Board Affiliation: Region of Southern Denmark

55 Phone: +45 7663 8221

56 Email: komite@rsyd.dk

57 Address:

59 Regionshuset

1 Damhaven 12  
2 7100 Vejle  
3 DENMARK

4 Data Monitoring: No

5 Plan to Share IPD:

6 FDA Regulated Intervention: No  
7  
8  
9

## 10 11 Study Description

12 Brief Summary: Background:

13  
14 Only around 20% of all patients seen in hospital with suspected Acute  
15 Coronary Syndrome will have Acute Myocardial Infarction. However, several  
16 studies indicate that patients where ACS had been excluded by conventional  
17 methods sustain a higher cardiac morbidity and mortality than the background  
18 population. Not all of these patients can be identified by traditional risk factors  
19 such as cholesterol, hypertension, and diabetes or with conventional methods  
20 such as ECG, troponin and clinical symptoms. Non-Contrast Cardiac-CT  
21 measures the amount of calcification in the coronary arteries and might be a  
22 useful addition in predicting future cardiac events in this patient group. The  
23 aim of this study is through a double-blinded study to determine whether  
24 non-contrast CT scan with calcium score can be used to identify patients at  
25 increased risk of death and cardiac event within the following 12 months after  
26 an acute admission where troponin measurements were normal.

27 Methods:

28  
29 The study will investigate patients with suspected Acute Coronary syndrome  
30 who have been examined and subsequently sent home from an emergency-  
31 or cardiology department without ACS or another obvious explanation. 750  
32 patients, age 30-70 years who are included in the study: "Identification of  
33 risk factors in non-cardiac chest pain patients" will be offered a non-contrast  
34 CT scan with calcium score within 14 days after the hospital contact. The  
35 participants will be included in a 12 months follow up, where the result of the  
36 calcium score is not revealed neither for the patient nor the investigator. After  
37 12 months the results of the scan is compared with the rate of cardiac events.  
38 This project is a multicenter study and recruits patients from 6 emergency - and  
39 cardiology departments in the region of Southern Denmark.

40  
41 The study commences at September 2014 and results of this project are  
42 expected to contribute to the risk stratification of Non-cardiac chest pain  
43 patients.

44 Detailed Description:  
45  
46

## 47 48 Conditions

49 Conditions: Coronary Artery Disease

50 Keywords:  
51  
52  
53

## 54 Study Design

55 Study Type: Observational

56 Observational Study Model: Cohort

57 Time Perspective: Prospective  
58  
59  
60

1 Biospecimen Retention: None Retained

2 Biospecimen Description:

3 Enrollment: 248 [Actual]

4 Number of Groups/Cohorts: 1

## 9 Groups and Interventions

10 Intervention Details:

11 Non-contrast Cardiac CT scan

## 14 Outcome Measures

16 Primary Outcome Measure:

17 1. major cardiac events

18 major cardiac events: cardiac deaths, revascularization, ischaemic related arrhythmias, cardiac related readmissions

19 [Time Frame: one year]

## 24 Eligibility

25 Study Population: The study will investigate patients with suspected Acute Coronary syndrome  
26 who have been examined and subsequently sent home from an emergency-  
27 or cardiology department without ACS or another obvious explanation. 750  
28 patients, age 30-70 years

30 Sampling Method: Non-Probability Sample

31 Minimum Age: 30 Years

32 Maximum Age: 70 Years

33 Sex: All

34 Gender Based:

35 Accepts Healthy Volunteers: No

36 Criteria: Inclusion Criteria:

- 37 • chest pain with normal cardiac enzymes.
- 38 • legal competent
- 39 • age 30-70 years

40 Exclusion Criteria:

- 41 • chest pain of obvious reason
- 42 • previous acute coronary syndrome
- 43 • previous coronary artery investigations within last five years
- 44 • patients referred for other cardiac examinations after the current admission

## 52 Contacts/Locations

53 Central Contact Person: Nivethitha Ilangkovan, M.D.

54 Telephone: +45 22787820

55 Email: Nivethitha.ilangkovan@rsyd.dk

56 Central Contact Backup: Christian B Mogensen, M.D.

57 Telephone: +45 79971123



Email: christian.backer.mogensen@rsyd.dk

Study Officials:

Locations: Denmark  
Sygehus Soenderjylland  
Aabenraa, Denmark, 6200

## References

Citations:

Links:

Study Data/Documents:

U.S. National Library of Medicine | U.S. National Institutes of Health | U.S. Department of Health & Human Services

For peer review only

Table 1 : Participants and non-participants comparison

| Characteristics        | Participants |    | Non-participants |    | P-value* |
|------------------------|--------------|----|------------------|----|----------|
|                        | n=229        | %  | n=212            | %  |          |
| Median Age (years/IQR) | 57(50-64)    |    | 52 (44-60)       |    | 0.001    |
| Male                   | 98           | 43 | 89               | 42 | 0.863    |
| Diabetes mellitus      | 22           | 10 | 10               | 5  | 0.048    |
| Hypertension           | 91           | 40 | 70               | 33 | 0.143    |
| Hypercholesterolemia   | 97           | 42 | 67               | 32 | 0.020    |
| Family history         | 124          | 54 | 93               | 44 | 0.031    |
| Smoking                | 58           | 25 | 57               | 27 | 0.709    |

P values compares the proportions of participants and non-participants that are known with the specific variable

Table 2: Descriptive characteristics of NSCP and background population.

|                                 | NSCP population |    | Background population |    | P-value* |
|---------------------------------|-----------------|----|-----------------------|----|----------|
|                                 | n=229           | %  | n=722                 | %  |          |
|                                 |                 |    |                       |    | 0.476    |
| Female                          | 131             | 57 | 327                   | 55 |          |
| Male                            | 98              | 43 | 295                   | 45 |          |
| Age                             |                 |    |                       |    | 0.001    |
| 30-39                           | 7               | 3  | -                     | -  |          |
| 40-49                           | 46              | 20 | -                     | -  |          |
| 50-59                           | 76              | 33 | 316                   | 44 |          |
| 60-70                           | 100             | 44 | 406                   | 56 |          |
| Hospital                        |                 |    |                       |    | 0.001    |
| Odense                          | 70              | 31 | 175                   | 24 |          |
| Vejle                           | 63              | 27 | 171                   | 24 |          |
| Aabenraa                        | 58              | 25 | -                     | -  |          |
| Svendborg                       | 38              | 17 | 180                   | 25 |          |
| Esbjerg                         | -               | -  | 196                   | 27 |          |
| Hypertension                    | 91              | 40 | 266                   | 37 | 0.458    |
| Hypercholesterolemia            | 97              | 42 | 126                   | 18 | 0.001    |
| Diabetes                        | 22              | 10 | 59                    | 8  | 0.509    |
| Family history                  | 124             | 54 | 287                   | 40 | 0.001    |
| Smoking                         | 58              | 25 | 314                   | 44 | 0.001    |
|                                 | Mean            |    | Mean                  |    |          |
| Systolic blood pressure (mmHg)  | 144             |    | 137                   |    | 0.001    |
| Diastolic blood pressure (mmHg) | 97              |    | 83                    |    | 0.002    |
| Pulse (rate/min)                | 74              |    | 71                    |    | 0.001    |
| Total cholesterol mmol/L        | 5.2             |    | 5.5                   |    | 0.005    |
| LDL cholesterol mmol/L          | 3.1             |    | 3.2                   |    | 0.067    |
| HDL cholesterol mmol/L          | 1.4             |    | 1.5                   |    | 0.088    |
| BMI (kg/m <sup>2</sup> )        | 27              |    | 27                    |    | 0.715    |

\*P values estimates for comparison of mean values.

Table 3: Median CAC estimates based on characteristics variable

|                         | NSCP                   | Background population  |          |
|-------------------------|------------------------|------------------------|----------|
|                         | Median CAC (IQR)<br>AU | Median CAC (IQR)<br>AU | P-value* |
| Female                  | 0(0;67)                | 0(0;18)                | 0.736    |
| Male                    | 18(0;83)               | 9(0;116)               | 0.117    |
| Age                     |                        |                        |          |
| 30-39                   | 0(0;1)                 |                        |          |
| 40-49                   | 0(0;5)                 |                        |          |
| 50-59                   | 0(0;33)                | 0(0;12.5)              | 0.247    |
| 60-70                   | 47(0;147)              | 7(0;110)               | 0.008    |
| Hospital                |                        |                        |          |
| Odense                  | 0(0;26)                | 1(0;69)                | 0.019    |
| Vejle                   | 8(0;104)               | 4(0;28)                | 0.109    |
| Aabenraa                | 10(0;120)              | -                      | -        |
| Svendborg               | 16(0;65)               | 0(0;61)                | 0.083    |
| Esbjerg                 | -                      | 0(0;66)                | -        |
| Hypertension            | 30(0;251)              | 4(0;96)                | 0.022    |
| Hypercholesterolemia    | 6(0;94)                | 14(0;127)              | 0.878    |
| Diabetes                | 61(0;253)              | 11(0;129)              | 0.251    |
| Familiar history of CVD | 3(0;72)                | 1(0;36)                | 0.198    |
| Smoking                 | 4(0;133)               | 5(0;73)                | 0.607    |

\* P value compares median value of CAC (AU) between NSCP and background population.

Table 4 : The distribution of CAC and endpoints for NSCP and background population.

|                          | Total |              | CAC=0 AU |              | CAC>0 AU  |                  |
|--------------------------|-------|--------------|----------|--------------|-----------|------------------|
|                          | n     | %(CI)        | n        | %(CI)        | n         | %(CI)            |
| NSCP                     | 2/229 | 0.9(0.2-2.9) | 0/106    | 0(0.0-3.0)   | 2/12<br>3 | 1.6(0.3-<br>5.3) |
| Background<br>population | 4/722 | 0.6(0.2-1.3) | 1/350    | 0.3(0.1-1.4) | 3/37<br>2 | 0.8(0.2-<br>2.2) |

Table 5: number of events in the patients referred directly for cardiac testing, the study population and Background population.

|           | Referred for cardiac<br>testing | Study population | Background<br>population |
|-----------|---------------------------------|------------------|--------------------------|
| number(n) | 211                             | 229              | 722                      |
| event (n) | 11                              | 2                | 4                        |
| %         | 5.2                             | 0.9              | 0.6                      |
| CI %      | 2.8-8.9                         | 0.1-2.9          | 0.2-1.3                  |

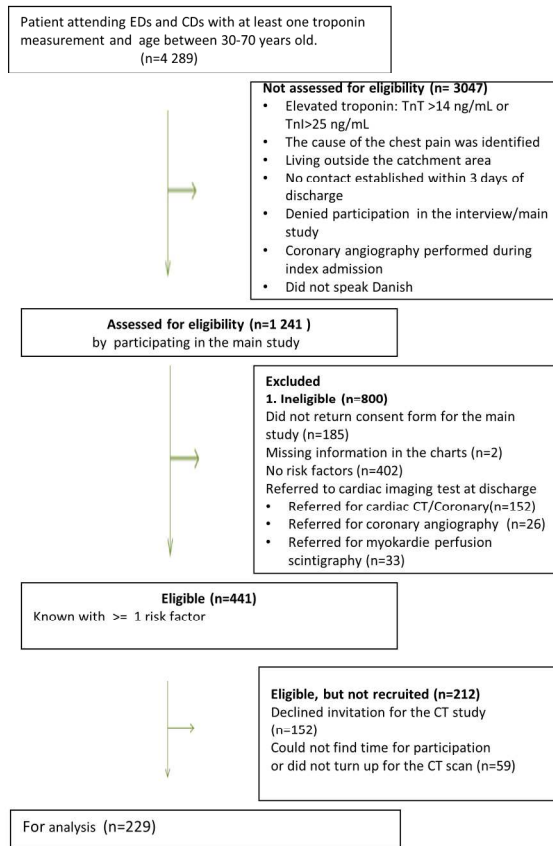

Figure 1: Flowchart for the inclusion of the NSCP population

254x338mm (300 x 300 DPI)

1  
2  
3  
4  
5  
6  
7  
8  
9  
10  
11  
12  
13  
14  
15  
16  
17  
18  
19  
20  
21  
22  
23  
24  
25  
26  
27  
28  
29  
30  
31  
32  
33  
34  
35  
36  
37  
38  
39  
40  
41  
42  
43  
44  
45  
46  
47  
48  
49  
50  
51  
52  
53  
54  
55  
56  
57  
58  
59  
60

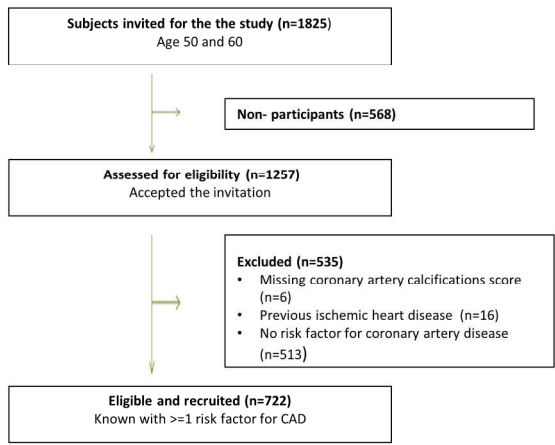

Figure 2: Flow chart for DanRisk

254x338mm (300 x 300 DPI)

## STROBE Statement—checklist of items that should be included in reports of observational studies

|                              | Item No | Recommendation                                                                                                                                                                                                                                                                                                                                                                                                                                                                                                                                                                                                                                                                                              |
|------------------------------|---------|-------------------------------------------------------------------------------------------------------------------------------------------------------------------------------------------------------------------------------------------------------------------------------------------------------------------------------------------------------------------------------------------------------------------------------------------------------------------------------------------------------------------------------------------------------------------------------------------------------------------------------------------------------------------------------------------------------------|
| <b>Title and abstract</b>    | 1       | (a) Indicate the study's design with a commonly used term in the title or the abstract (Page 1)<br>(b) Provide in the abstract an informative and balanced summary of what was done and what was found (page 1)                                                                                                                                                                                                                                                                                                                                                                                                                                                                                             |
| <b>Introduction</b>          |         |                                                                                                                                                                                                                                                                                                                                                                                                                                                                                                                                                                                                                                                                                                             |
| Background/rationale         | 2       | Explain the scientific background and rationale for the investigation being reported (Page 2)                                                                                                                                                                                                                                                                                                                                                                                                                                                                                                                                                                                                               |
| Objectives                   | 3       | State specific objectives, including any prespecified hypotheses (Page 3)                                                                                                                                                                                                                                                                                                                                                                                                                                                                                                                                                                                                                                   |
| <b>Methods</b>               |         |                                                                                                                                                                                                                                                                                                                                                                                                                                                                                                                                                                                                                                                                                                             |
| Study design                 | 4       | Present key elements of study design early in the paper (Page 3)                                                                                                                                                                                                                                                                                                                                                                                                                                                                                                                                                                                                                                            |
| Setting                      | 5       | Describe the setting, locations, and relevant dates, including periods of recruitment, exposure, follow-up, and data collection (Page 3-6)                                                                                                                                                                                                                                                                                                                                                                                                                                                                                                                                                                  |
| Participants                 | 6       | (a) <i>Cohort study</i> —Give the eligibility criteria, and the sources and methods of selection of participants. Describe methods of follow-up (Page 3-4)<br><i>Case-control study</i> —Give the eligibility criteria, and the sources and methods of case ascertainment and control selection. Give the rationale for the choice of cases and controls<br><i>Cross-sectional study</i> —Give the eligibility criteria, and the sources and methods of selection of participants<br>(b) <i>Cohort study</i> —For matched studies, give matching criteria and number of exposed and unexposed<br><i>Case-control study</i> —For matched studies, give matching criteria and the number of controls per case |
| Variables                    | 7       | Clearly define all outcomes, exposures, predictors, potential confounders, and effect modifiers. Give diagnostic criteria, if applicable (Page 4)                                                                                                                                                                                                                                                                                                                                                                                                                                                                                                                                                           |
| Data sources/<br>measurement | 8*      | For each variable of interest, give sources of data and details of methods of assessment (measurement). Describe comparability of assessment methods if there is more than one group (Page 4-5)                                                                                                                                                                                                                                                                                                                                                                                                                                                                                                             |
| Bias                         | 9       | Describe any efforts to address potential sources of bias (Page 6)                                                                                                                                                                                                                                                                                                                                                                                                                                                                                                                                                                                                                                          |
| Study size                   | 10      | Explain how the study size was arrived at (Page 6)                                                                                                                                                                                                                                                                                                                                                                                                                                                                                                                                                                                                                                                          |
| Quantitative variables       | 11      | Explain how quantitative variables were handled in the analyses. If applicable, describe which groupings were chosen and why (Page 6)                                                                                                                                                                                                                                                                                                                                                                                                                                                                                                                                                                       |
| Statistical methods          | 12      | (a) Describe all statistical methods, including those used to control for confounding (Page 7)<br>(b) Describe any methods used to examine subgroups and interactions (Page 6-7)<br>(c) Explain how missing data were addressed (Page 4)<br>(d) <i>Cohort study</i> —If applicable, explain how loss to follow-up was addressed<br><i>Case-control study</i> —If applicable, explain how matching of cases and controls was addressed<br><i>Cross-sectional study</i> —If applicable, describe analytical methods taking account of sampling strategy<br>(e) Describe any sensitivity analyses                                                                                                              |

Continued on next page



**Results**

|                  |     |                                                                                                                                                                                                                                                                                                                                                                                                                                    |
|------------------|-----|------------------------------------------------------------------------------------------------------------------------------------------------------------------------------------------------------------------------------------------------------------------------------------------------------------------------------------------------------------------------------------------------------------------------------------|
| Participants     | 13* | (a) Report numbers of individuals at each stage of study—eg numbers potentially eligible, examined for eligibility, confirmed eligible, included in the study, completing follow-up, and analysed ( Page 7)<br>(b) Give reasons for non-participation at each stage ( Page 9)<br>(c) Consider use of a flow diagram (Page 9)                                                                                                       |
| Descriptive data | 14* | (a) Give characteristics of study participants (eg demographic, clinical, social) and information on exposures and potential confounders (Page 10)<br>(b) Indicate number of participants with missing data for each variable of interest (None, missing CAC not included in the study)<br>(c) <i>Cohort study</i> —Summarise follow-up time (eg, average and total amount) (Page 12)                                              |
| Outcome data     | 15* | <i>Cohort study</i> —Report numbers of outcome events or summary measures over time (Page 12-13)<br><i>Case-control study</i> —Report numbers in each exposure category, or summary measures of exposure<br><i>Cross-sectional study</i> —Report numbers of outcome events or summary measures                                                                                                                                     |
| Main results     | 16  | (a) Give unadjusted estimates and, if applicable, confounder-adjusted estimates and their precision (eg, 95% confidence interval). Make clear which confounders were adjusted for and why they were included (Page 12)<br>(b) Report category boundaries when continuous variables were categorized ( Page 12)<br>(c) If relevant, consider translating estimates of relative risk into absolute risk for a meaningful time period |
| Other analyses   | 17  | Report other analyses done—eg analyses of subgroups and interactions, and sensitivity analyses (Page 13)                                                                                                                                                                                                                                                                                                                           |

**Discussion**

|                  |    |                                                                                                                                                                                         |
|------------------|----|-----------------------------------------------------------------------------------------------------------------------------------------------------------------------------------------|
| Key results      | 18 | Summarise key results with reference to study objectives (Page 14)                                                                                                                      |
| Limitations      | 19 | Discuss limitations of the study, taking into account sources of potential bias or imprecision. Discuss both direction and magnitude of any potential bias (Page 15)                    |
| Interpretation   | 20 | Give a cautious overall interpretation of results considering objectives, limitations, multiplicity of analyses, results from similar studies, and other relevant evidence (Page 14-15) |
| Generalisability | 21 | Discuss the generalisability (external validity) of the study results (Page 16)                                                                                                         |

**Other information**

|         |    |                                                                                                                                                                         |
|---------|----|-------------------------------------------------------------------------------------------------------------------------------------------------------------------------|
| Funding | 22 | Give the source of funding and the role of the funders for the present study and, if applicable, for the original study on which the present article is based (Page 17) |
|---------|----|-------------------------------------------------------------------------------------------------------------------------------------------------------------------------|

\*Give information separately for cases and controls in case-control studies and, if applicable, for exposed and unexposed groups in cohort and cross-sectional studies.

**Note:** An Explanation and Elaboration article discusses each checklist item and gives methodological background and published examples of transparent reporting. The STROBE checklist is best used in conjunction with this article (freely available on the Web sites of PLoS Medicine at <http://www.plosmedicine.org/>, Annals of Internal Medicine at <http://www.annals.org/>, and Epidemiology at <http://www.epidem.com/>). Information on the STROBE Initiative is available at [www.strobe-statement.org](http://www.strobe-statement.org).

# BMJ Open

## The Prevalence of Coronary Artery Calcium in a on-specific Chest Pain Population in Emergency and Cardiology Departments compared to the Background Population – a prospective cohort study with 12 months follow up for clinical endpoints

|                                 |                                                                                                                                                                                                                                                                                                                                                                                                                                                                                                                                                                                                                                                                                                                                                                                                             |
|---------------------------------|-------------------------------------------------------------------------------------------------------------------------------------------------------------------------------------------------------------------------------------------------------------------------------------------------------------------------------------------------------------------------------------------------------------------------------------------------------------------------------------------------------------------------------------------------------------------------------------------------------------------------------------------------------------------------------------------------------------------------------------------------------------------------------------------------------------|
| Journal:                        | <i>BMJ Open</i>                                                                                                                                                                                                                                                                                                                                                                                                                                                                                                                                                                                                                                                                                                                                                                                             |
| Manuscript ID                   | bmjopen-2017-018391.R1                                                                                                                                                                                                                                                                                                                                                                                                                                                                                                                                                                                                                                                                                                                                                                                      |
| Article Type:                   | Research                                                                                                                                                                                                                                                                                                                                                                                                                                                                                                                                                                                                                                                                                                                                                                                                    |
| Date Submitted by the Author:   | 28-Sep-2017                                                                                                                                                                                                                                                                                                                                                                                                                                                                                                                                                                                                                                                                                                                                                                                                 |
| Complete List of Authors:       | Ilangkovan, Nivethitha; Hospital of Southern Denmark, Department of Cardiology<br>Mogensen, Christian; Hospital of Southern Denmark, Emergency Department<br>Mickley, Hans; Odense Universitetshospital, Cardiology<br>Lassen, Annmarie; Odense University Hospital, Department of Emergency Medicine<br>Lambrechtsen, Jess; Odense University Hospital, Department of Medicine<br>Sand, Niels Peter; Esbjerg Hiospital, Cardiology<br>Albiniussen, Rasmus; Hospital of Southern Denmark, Department of Cardiology<br>Byg, Jorgen; Hospital of Southern Denmark, Department of Cardiology<br>Hald, Flemming; Vejle Hospital, Department of cardiology<br>Grønhøj, Mette; Odense Universitetshospital, Department of cardiology<br>Diederichsen, Axel; Odense Universitetshospital, Department of Cardiology |
| <b>Primary Subject Heading</b>: | Cardiovascular medicine                                                                                                                                                                                                                                                                                                                                                                                                                                                                                                                                                                                                                                                                                                                                                                                     |
| Secondary Subject Heading:      | Emergency medicine, Diagnostics                                                                                                                                                                                                                                                                                                                                                                                                                                                                                                                                                                                                                                                                                                                                                                             |
| Keywords:                       | Coronary heart disease < CARDIOLOGY, Coronary intervention < CARDIOLOGY, Ischaemic heart disease < CARDIOLOGY, Myocardial infarction < CARDIOLOGY, Cardiovascular imaging < RADIOLOGY & IMAGING, Computed tomography < RADIOLOGY & IMAGING                                                                                                                                                                                                                                                                                                                                                                                                                                                                                                                                                                  |
|                                 |                                                                                                                                                                                                                                                                                                                                                                                                                                                                                                                                                                                                                                                                                                                                                                                                             |

SCHOLARONE™  
Manuscripts

# The Prevalence of Coronary Artery Calcium in a on-specific Chest Pain Population in Emergency and Cardiology Departments compared to the Background Population

– a prospective cohort study with 12 months follow up for clinical endpoints.

Nivethitha Ilangkovan<sup>1</sup>, Christian Backer Mogensen<sup>2</sup>, Hans Mickley<sup>3</sup>, Annmarie Lassen<sup>4</sup>, Jess Lambrechtsen<sup>5</sup>, Niels Peter Sand<sup>6</sup>, Rasmus Albinussen<sup>1</sup>, Jørgen Byg<sup>1</sup>, Flemming Hald<sup>7</sup>, Mette Hjortdal Grønhøj<sup>3</sup>, Axel Diederichsen<sup>3</sup>

1 Cardiology Department, Hospital of Southern Denmark, Aabenraa, Denmark.

2. Emergency Department, Hospital of Southern Denmark, Aabenraa, Denmark.

3. Cardiology Department, Odense University Hospital, Odense, Denmark.

4. Emergency Department, Odense University Hospital, Odense, Denmark.

5. Medical Department, Svendborg Hospital, Svendborg, Denmark.

6. Cardiology Department, Esbjerg Hospital, Esbjerg, Denmark.

7. Cardiology Department, Vejle Hospital, Vejle, Denmark.

Corresponding author

Nivethitha Ilangkovan

Email: [nilangkovan@gmail.com](mailto:nilangkovan@gmail.com)

Kresten Philipsens vej 15, 6200 Aabenraa

Denmark

## Abstract

**Objectives:** To examine the prevalence of Coronary Artery Calcification (CAC) and frequency of cardiac events in a cohort of Non-Specific Chest Pain (NSCP) patients (an acute admission for chest pain and discharged without an obvious reason for the chest pain) and compare with the background population.

**Design:** A double blinded prospective observational cohort study examined with measurement of the CAC score and one year of follow-up.

**Setting:** Departments of Emergency Medicine and Cardiology in the Southern Region of Denmark.

**Subjects:** 229 NSCP patients were compared with 722 subjects from the background population.

**Main outcomes measures:** Prevalence of CAC, incidence of unstable angina (UAP), acute myocardial infarction (MI), ventricular tachycardia (VT), coronary revascularization and cardiac related mortality.

**Results:** No significant difference in prevalence of CAC (Odds ratio (OR) 0.9 (95%CI: 0.6-1.3), p=0.546) or frequencies of endpoints (p=0.64) were found. The OR for CAC >100 AU was 1.0 (95% CI:0.6-1.5) p=0.826 for NSCP patients compared to the background population. During one year follow-up two (0.9%) NSCP

1  
2  
3  
4 patients were revascularised, while none experienced UAP, MI, VT or death. In the background population  
5 four (0.6%) had a clinical endpoint; two MI, one VT and one cardiac related death.

6  
7 Conclusion: The prevalence of CAC (CAC>0 AU) among NSCP patients was comparable with the background  
8 population. The risk of an event was low. A CAC examination seems not to be useful in the case of NSCP  
9 patients.  
10  
11  
12  
13  
14  
15  
16  
17  
18  
19  
20  
21  
22  
23  
24  
25  
26  
27  
28  
29  
30  
31  
32  
33  
34  
35  
36  
37  
38  
39  
40  
41  
42  
43  
44  
45  
46  
47  
48  
49  
50  
51  
52  
53  
54  
55  
56  
57  
58  
59  
60

For peer review only

## Strength and limitations

- The patients were unselected and all-comers.
- The patients were included from six hospitals.
- The number of included patients was relatively small.
- No patients were lost to follow-up.
- Few events occurred during follow-up.

## Introduction

Cardiovascular disease (CVD) remains a major public health problem and is the number one cause of death among men and women in Europe and United State (1-3). Less than one in five patients with chest pain in the emergency departments turns out to fulfill the diagnostic criteria of acute myocardial infarction (MI) (4, 5). Other causes of acute chest pain may be of cardiovascular origin (aneurism, aortic dissection pulmonary embolism), but can also be non-cardiac related (gastrointestinal disorders, musculoskeletal disorders) while in a significant number of patients the cause of symptoms remains unknown, and these patients are defined as having Non-Specific Chest Pain (NSCP) (6).

However, even if acute MI is definitely excluded, coronary artery disease (CAD) may be present with an inherent risk of future cardiac events. Hence, 0.8% -2.1% of the patients excluded for MI experienced an adverse outcome during 30 days follows up after discharge from an emergency department (7, 8). It has been shown that up to 20% of patients with CAD do not have any traditional risk factors such as hypertension, hyperlipidemia, diabetes or smoking (9), thus a non-contrast cardiac CT might serve as a tool in risk stratification by measuring the presence and extent of coronary artery calcium (CAC). The advantages of non-contrast cardiac CT are that the method is easy to perform and interpret, the reproducibility is high and the radiation exposure is low (10-13). The role of a non-contrast cardiac CT as a risk stratification tool has been established in asymptomatic persons (14, 15) . The prevalence of CAC in an asymptomatic general population without known prior CVD has been shown to be 44%-50% (16, 17). However, the clinical importance of CAC in patients with acute chest pain, in whom an acute MI has been ruled out, remains to be investigated.

In order to evaluate the non-contrast cardiac CT as a potential risk stratification tool for patients with NSCP the aim of the present study was twofold. First, we wanted to investigate the prevalence of CAC among NSCP patients and to compare the findings with observations from an asymptomatic background population. Second, we wished to examine the frequency of clinical cardiac events related to CAC in NSCP patients during a 12 months follow-up period, and compare these data with the results from the

1  
2  
3  
4 asymptomatic background population but also the NSCP patients who were directly referred for a further  
5 cardiac test from index contact.  
6  
7

## 8 9 **Method and materials**

### 10 **Study design**

11  
12 This study was a double blinded prospective observational cohort study that included patients from the  
13 emergency and cardiology departments in the Region of Southern Denmark. All patients with an acute visit  
14 for chest pain and suspicion of cardiac ischemia admitted to the hospitals in Odense, Svendborg, Vejle,  
15 Kolding, Aabenraa or Sonderborg, and at least one troponin measurement during the contact were  
16 included. Chest x-ray, CT scans, echocardiography and other diagnostic tests during the admission were  
17 applied at the sole discretion of the attending physician, but not used in this study. The inclusion period  
18 was from September 2014 until May 2015. The patients were invited for this study, if they were discharged  
19 with a NSCP diagnosis (ICD codes: DR072/DR073/DR034/DR035) and without any obvious reason for the  
20 chest pain. Furthermore we excluded patients who were referred directly for further cardiac imaging test  
21 by the discharging physician.  
22  
23  
24  
25  
26  
27  
28  
29

### 30 **Study population**

31 Through the central biochemical laboratory for all hospitals in the region of Southern Denmark, all patients  
32 with measurement of troponin in the emergency and cardiology departments were identified on a daily  
33 basis. Electronic patient files were scrutinized in all patients with normal troponin values, as defined below.  
34 Patients had to complete a structured questionnaire by a telephone interview within three days of  
35 discharge from the index admission.  
36  
37  
38

39 Afterwards written information and a consent form for participation was sent to the patient. Patients who  
40 returned the consent form were scheduled for the CT scan. The participant and the physicians were blinded  
41 for the result of the non-contrast CT.  
42  
43  
44

45 The inclusion and exclusion criteria for the study is defined below  
46  
47  
48

#### 49 *Inclusion criteria:*

- 50 • Normal troponin ( high sensitivity troponin T <14 ng/L or high sensitivity troponin I < 25 ng/L)
- 51 • Age 30-70 years
- 52 • Known with one risk factor for CAD (present smoker, hypertension, hypercholesterolemia, familiar  
53 disposition to CVD, and diabetes mellitus).  
54  
55  
56  
57

1  
2  
3  
4  
5  
6  
*Exclusions criteria:*

- 7 • Living outside the catchment area of Region of Southern Denmark
  - 8 • Refusing participation in the telephone interview and or CT scan
  - 9 • Previous history of CAD defined as MI or coronary revascularization.
  - 10 • Coronary angiography/cardiac CT or myocardial scintigraphy performed within the last 5 years.
  - 11 • None Danish speakers
- 12  
13  
14  
15

16 We used the Danish Risk Score study (DanRisk) population (17) as a control group representing the  
17 background population. The DanRisk study population consisted of 1 257 asymptomatic subjects aged 50  
18 and 60 years old, who in 2009 had been examined in one of four cardiac computer tomography (CT) centers  
19 (Odense, Esbjerg, Vejle or Svendborg) in the Region of Southern Denmark. The exclusion criteria in the  
20 present study are asymptomatic individuals without risk factors for CAD (hypertension,  
21 hypercholesterolemia, familiar disposition, known smoker and diabetes mellitus), known CAD and missing  
22 CAC scores.  
23  
24  
25  
26  
27  
28

29 **Definitions**

30 In the NSCP population comorbidity was self-reported. Diabetes mellitus was defined as the use of  
31 antidiabetic medication or a diagnosis given by their general practitioner. Hypertension and  
32 hypercholesterolemia were present if the patients stated to be in relevant medical treatment or had  
33 received the diagnoses by the general practitioner. Family history was defined as a first degree relative with  
34 CVD without consideration to age. Smoking was defined as a current smoker. Systolic and diastolic blood  
35 pressure and heart rate were retrieved from the patient files, as the first measured value during the index  
36 admission. Cholesterol values were collected up to three months before and three months after the index  
37 admission. The value closest to the index date was used. BMI was calculated based on self-reported height  
38 and weight.  
39  
40  
41  
42  
43  
44

45 For the background population diabetes mellitus was defined as use of anti-diabetic medication that  
46 included any oral antidiabetic drug and/or insulin. Hypertension was defined as the use of antihypertensive  
47 medical treatment. Hypercholesterolemia was defined as use of lipid lowering medication. Family history  
48 was defined as first degree relative with CVD, male <55 years and female <65 years. Smoking was defined  
49 as current smoker. Blood pressure, heart rate, BMI and cholesterol values were measured at baseline  
50 examination.  
51  
52  
53  
54  
55  
56  
57  
58  
59  
60

### **Troponins**

The cardiac troponin I, used by Odense University Hospital, was analyzed by use of the Abbot Diagnostics architect with an upper reference limit of 99<sup>th</sup> percentile of 25 ng/L and a coefficient of variation < 10% at 5 ng/L. The decision limit for MI was set at  $\geq 25$  ng/L

Troponin T, used by all other participating hospitals, was analysed by Roche diagnostic elecsys 2010, modular analytics E170, Cobas e411, cobas e601. The 99<sup>th</sup> percentile upper reference limit was 14 ng/L and a coefficient variation <10% at 13 ng/L. The decision limit was set  $\geq 14$  ng/L for MI.

### **Cardiac CT protocol**

CAC was assessed by summing the scores from all foci in the coronary arteries and expressed in Agatston unit (AU) (10). CAC was assessed by trained radiographers, and reanalysed by the first author in 52 subjects. Two centers used dual-source CT scanner (SOMATOM Definition Flash, Siemens Healthcare, Forchheim, Germany) with prospective ECG triggering. In persons with heart rate <75 beats/minute the ECG triggering was set in diastolic phase at 65-75% of the cardiac R-R interval. In persons with heart rate  $\geq 75$  beats/min the ECG triggering was set in systolic phase at 250-400 ms. Additional settings: sequential prospective scan, slice thickness 3 mm, collimation 128 x 0.6 mm, gantry rotation time 0.28ms, 120 kV tube voltage, 90 mAs/rotation.

One center used a GE 64-slice CT-scanner (Discovery 750 HD; GE Healthcare). In persons with heart rate <75 beats/minute the ECG triggering was set in diastolic phase at 75% of the cardiac R-R interval. In persons with heartrate  $\geq 75$  beats/min the ECG triggering was set in systolic phase at 40% of the cardiac R-R interval. Additional settings: sequential prospective scan, slice thickness 2.5 mm, collimation 64 x 0.625 mm, gantry rotation time 0.35ms, 120 kV tube voltage and 200 mA tube current.

The last center used a Toshiba Aquillion ONE Next Generation (Toshiba Medical systems) CT scanner with prospective ECG triggering. If heart rate was <75 bpm the ECG triggering was in the diastole phase at 65%-75% of the R-R interval. In persons with heart rates  $\geq 75$  beats/min the ECG triggering was set in systolic phase at 40%. Additional settings: sequential prospective scan, slice Thickness was 0.5 mm, collimation after scan range 0.5 mm x 240 – 320, gantry rotation time 0.275 ms and 120 kV tube voltage.

### **Follow-up**

The study was conducted as a double blinded study with a 12 month follow-up time. Neither the participants nor the investigators knew the results of the CAC score before the end of follow-up. By then the participants and their general practitioner received a letter with the results of the CAC score.



1  
2  
3  
4 The clinical endpoints in the follow-up study were unstable angina (UAP), non-fatal MI, ventricular  
5 tachycardia (VT), coronary revascularization and cardiac death. The endpoints were compared with the  
6 background population. Furthermore we did a comparison with NSCP patients who were referred for  
7 cardiac imaging testing at the index admission and thus did not participate in our study. These patients  
8 were referred for further diagnostic testing by the physician on call that evaluated these patients to have a  
9 higher risk of CAD.  
10  
11  
12  
13  
14

### 15 **Sample size**

16 A sample size calculation was performed before the study. The prevalence of elevated CAC score (CAC>0  
17 AU) in the Dan Risk background asymptomatic population was 44%. We assumed that the prevalence of  
18 CAC score in our symptomatic low risk population was at least 18% point higher, i.e. 62%, since on a  
19 symptomatic population referred for coronary angiography 79% had a CAC>0 AU (13). In order to detect a  
20 risk factor with a size of at least OR 2.1 in the group exposed to the factor, with a significance level of 95%  
21 and a power of 80% and a ratio 1 of exposed/non-exposed we needed a sample size of at least 238  
22 patients, using Fleiss method.  
23  
24  
25  
26  
27

### 28 **Statistical analyses**

29 Categorical variables are presented with frequency tables and percentages. Distributions of all continuous  
30 variables were evaluated by empirical histograms, and normally distributed variables are presented as  
31 mean and standard deviation (SD), while skewed distributed continuous variables are presented as median  
32 and interquartile range (IQR). Fischer's exact test and Chi square test are used for categorical variables, t-  
33 test for comparison of normally distributed variables, while the Wilcoxon's rank sum test are used skewed  
34 distributed variables. In multivariate analyses including the traditionally risk factors (gender, age, smoking,  
35 hypertension, hypercholesterolemia, diabetes mellitus, body mass index and family history of  
36 cardiovascular disease) the prevalence of CAC (the outcome variable) >0 and CAC >=100 among the NSCP  
37 patients and background population were compared. Pearson's correlation was used to measure the  
38 agreement between two CAC score readers in 52 cases. The correlation coefficient was 99%. Analyses were  
39 performed with STATA SE 14 (StataCorp, College Station, TX, USA). A two-sided P-value < 0.05 was  
40 considered statistically significant.  
41  
42  
43  
44  
45  
46  
47  
48  
49

### 50 **Ethics**

51 The protocol was approved by the Regional Scientific Ethical Committee for Southern Denmark (S-  
52 20140055) and conducted in accordance with the Declaration of Helsinki. The study was registered in  
53  
54  
55  
56  
57

Clinical trial with number NCT02422316. The study was registered with The Danish Data Protection Agency (2008-58-0035 no 1092). Written informed consent was obtained from each participant.

The DanRisk protocol was approved by the Regional Scientific Ethical Committee for Southern Denmark (S-20080140) and was conducted in accordance with the Declaration of Helsinki. Written informed consent was obtained from each participant.

## Results

In total 4 289 patients aged 30 to 70 years old attended an Emergency or Cardiology Department and had at least one a troponin measurement done. After exclusion of 3 047 patients (i.e. elevated troponin, identified cause of the chest pain, no consent, see Figure 1), 1 241 were left for study eligibility. However, further 800 of these for different reasons (i.e. no risk factors, referred for coronary imaging) had to be excluded from participation in a cardiac CT scan examination. Of the remaining 441 patients with NSCP 229 patients (participants) accepted the invitation, and to underwent a cardiac CT scan, while 212 patients (non-participants) either declined the invitation or did not show up at the time of cardiac CT-scan. The non-participants represented individuals that were eligible but not recruited. The mean age was 57 (IQR 50;64) and 52 (IQR 44;60) years in participants and in non-participants, respectively,  $p=0.001$ . Significantly more were known with hypercholesterolemia and a family history of CVD among participants compared to non-participants, while no significant differences were found in gender, diabetes, hypertension or smoking status (Table 1).

Table 1 : Baseline characteristics of participants and non-participants

|                      | Participants<br>n=229(%) | Non-participants<br>n=212 | P-value |
|----------------------|--------------------------|---------------------------|---------|
| Age (years)          | 57(56-58)                | 52 (50-53)                | 0.001   |
| Male                 | 98 (43)                  | 89 (42)                   | 0.86    |
| Diabetes mellitus    | 22 (10)                  | 10 (5)                    | 0.048   |
| Hypertension         | 91 (40)                  | 70 (33)                   | 0.14    |
| Hypercholesterolemia | 97 (42)                  | 67 (32)                   | 0.02    |
| Family history       | 124 (54)                 | 93 (44)                   | 0.03    |
| Smoking              | 58 (25)                  | 57 (27)                   | 0.71    |

Values are n (%) or mean  $\pm$  SD.

Figure 2 shows the selection of the background population. 1 825 random individuals 50 or 60 years old were invited for participation, and 1 257 accepted the invitation. In the present study a total of 535 individuals were excluded; 513 did not fulfill the criteria of having at least one risk factor, 16 patients were

known with CAD and 6 did not have a CAC score performed. In total, 722 individuals from the DanRisk study served as background population.

Table 2 lists the baseline characteristics for the NSCP patients and the background population. Mean age for the NSCP population was 57 years and 55 years for background population ( $p=0.007$ ). A significantly higher proportion of NSCP patients had known hypercholesterolemia and a family history of cardiovascular disease, while more from the background population were smokers. Furthermore, a significant difference between the populations regarding blood pressure, heart rate and total cholesterol was found.

Table 2: Descriptive characteristics of non-Specific Chest Pain patients and the background population.

|                                          | NSCP patients<br>n=229 (%) | Background<br>population<br>n=722 (%) | P-value |
|------------------------------------------|----------------------------|---------------------------------------|---------|
| Male                                     | 98 (43)                    | 295 (45)                              | 0.48    |
| Age                                      | 57 ±9                      | 55 ±5                                 | 0.008   |
| 30-39                                    | 7 (3)                      | -                                     |         |
| 40-49                                    | 46 (20)                    | -                                     |         |
| 50-59                                    | 76 (33)                    | 316 (44)                              | 0.001   |
| 60-70                                    | 100 (44)                   | 406 (56)                              |         |
| Hypertension                             | 91 (40)                    | 266 (37)                              | 0.460   |
| Hypercholesterolemia                     | 97 (42)                    | 126 (18)                              | 0.001   |
| Diabetes                                 | 22 (10)                    | 59 (8)                                | 0.51    |
| Family history of cardiovascular disease | 124 (54)                   | 287 (40)                              | 0.001   |
| Smoking                                  | 58(25)                     | 314(44)                               | 0.001   |
| Previous smoker                          | 74(32)                     | 197(27)                               | 0.142   |
| Non-smoker                               | 97(42)                     | 211(29)                               | 0.001   |
| Systolic blood pressure (mmHg)           | 144 ±30                    | 137 ±19                               | 0.001   |
| Diastolic blood pressure (mmHg)          | 97 ±122                    | 83 ±10                                | 0.002   |
| Heart rate                               | 74 ±14                     | 71 ±14                                | 0.001   |
| Total cholesterol (mmol/L)               | 5.2 ±1.1                   | 5.5 ±1.1                              | 0.005   |
| LDL cholesterol (mmol/L)                 | 3.1 ±0.9                   | 3.2 ±0.9                              | 0.070   |
| HDL cholesterol (mmol/L)                 | 1.4 ±0.5                   | 1.5 ±0.5                              | 0.080   |
| BMI (kg/m <sup>2</sup> )                 | 27 ±6                      | 27 ±5                                 | 0.715   |
| CAC score (AU)                           | 2(0:74)                    | 1 (0:54)                              | 0.230   |
| 0                                        | 106 (46)                   | 350 (48)                              | 0.679   |
| 1-99                                     | 74(32)                     | 238(33)                               | 0.897   |
| ≥ 100                                    | 49(22)                     | 134(19)                               | 0.438   |

Values are n (%), mean ± SD, or median (IQR). NSCP = non-Specific Chest Pain, AU=Agatston unit

The prevalence of the CAC score categories (0 AU, 1-99 AU ≥100 AU) were similar (46%, 32%, 22% versus 48%, 33% and 19%,  $p=0.630$ ) for NSCP and background population, and there was no difference in the

1  
2  
3  
4 median CAC score (2 AU (IQR 0;74 AU) and 1 AU (IQR 0;54 AU),  $p=0.229$ ). In the subgroups there was no  
5 difference in the median CAC scores between NSCP patients and the background population concerning  
6 females (0 AU (IQR 0;67 AU) and 0 AU (IQR 0;18 AU),  $p=0.74$ ), males ( 18 AU (IQR 0;83 AU) and 9 AU (IQR  
7 0;116 AU),  $p=0.12$ ), and the 50-59 years old (0 AU (IQR 0;33 AU) and 0 AU (IQR 0;12.5 AU),  $p=0.25$ ), while  
8 the 60-69 years old had a higher median CAC score (47 AU (IQR 0;147 AU) versus 7 AU (IQR 0;110 AU),  
9  $p=0.008$ ). In the multivariate logistic regression analysis no significant difference was found between the  
10 presences of CAC in the NSCP vs the background population (Odds ratio (OR) 0.9 (95%CI: 0.6-1.3),  $p=0.546$ ).  
11 The OR for CAC >100 AU was 1.0 (95% CI:0.6-1.5)  $p=0.826$ .

12  
13  
14  
15  
16 In 52 cases two independent readers performed the CAC score measurement, and Pearson's correlation  
17 was 99%.

18  
19  
20  
21 During one year of follow-up 2 out of 229 NSCP patients were revascularized, while no one had UAP, MI, VT  
22 or died from cardiac related causes. The two patients with events were a female aged 64 and a male aged  
23 60 years with a CAC score of 349 and 2 595, respectively. Both were known with hypertension,  
24 hypercholesterolemia and a family history of CVD. The event rate in the background population was 4 out  
25 of 722; two had MI, one had VT and one cardiac related death. All four patients were males. The patient  
26 with VT was 50 years, and had a CAC=0, but also a family history of CVD. The three remaining were 60 years  
27 old with a CAC score of 166, 832 and 1326 respectively. One was a smoker, one had hypertension and  
28 hypercholesterolemia, while the last was smoking, had diabetes and a family history of CVD. Fishers exact  
29 test showed no statistically difference in the incidence of endpoints between NSCP and background  
30 population (0.9% (95%CI: 0.1-2.9) vs 0.6% (95%CI: 0.2-1.3),  $p=0.64$ ).

31  
32  
33  
34  
35  
36  
37  
38  
39  
40  
41  
42  
43  
44  
45  
46  
47  
48  
49  
50  
51  
52  
53  
54  
55  
56  
57  
58  
59  
60  
211 patients were referred for further work up from the index contact and not included in this study. 152  
went through a cardiac CT, 26 were referred for coronary angiography and 33 for myocardial perfusion  
scintigraphy. Two patients had UAP, two had MI and nine had coronary revascularization performed during  
one year of follow-up. No one had VT or died from cardiac related causes. 11 out of 211 patients (5.2%  
(95%CI: 2.8-8.9)) had an event, and the rate was significantly higher in this group of patients compared to  
the NSCP patients and background population ( $p=0.001$ ).

## Discussion

This is the first study to our knowledge to evaluate the role of non-contrast CT in a NSCP population.  
We showed that CAC can be detected in roughly half of patients with NSCP, and the occurrence does not  
differ significantly from what can be found in the general population. Furthermore, the prognosis for NSCP

1  
2  
3  
4 patients does not differ from the prognosis in the asymptomatic background population. However  
5 comparing NSCP patients and background population with those referred for cardiac investigation at index  
6 contact showed the latter to have a significant higher rate of clinical events. As the CAC score in NSCP  
7 patients does not differ from the general population, we thus do not consider the results of a non-contrast  
8 CT scanning as a potential stratification tool for NSCP patients. The use of cardiac CT scan for CAC appears  
9 to be of limited value in the setting of patients with NSCP, and could in the worst case scenario lead to  
10 more downstream test utilization.

11  
12  
13  
14  
15 Laudon et al. (18) showed that in non-cardiac chest pain patients presenting to the ED and fulfilling the  
16 criteria for UAP, the prevalence of CAC was 49%, which is consistent with our findings in NSCP patients.  
17 Non-cardiac chest pain patients, all though excluded for MI, comprise a heterogeneous group and also  
18 include patients with other causes of chest pain than cardiac related. In Laudon's study non-cardiac chest  
19 pain patients with a CAC=0 had a 5 year probability of event free survival of 100%. This was significantly  
20 better than the cardiac related chest pain group, which implies that a non-contrast CT scan may be useful in  
21 the discrimination between non-cardiac related and cardiac related chest pain. However, the study by  
22 Laudon et al included patients fulfilling the criteria for unstable angina, who were scanned during index  
23 contact, which makes their patient population a higher risk than our patients. NSCP patients in our study  
24 were scanned after discharge and exclusion for high risk patients that were referred for further  
25 investigation at index contact.

26  
27  
28  
29  
30  
31  
32 The Society of Cardiovascular Computed Tomography Guidelines recommends (19) that patients in the  
33 emergency department with acute chest pain, a negative ECG, normal biomarkers and low to intermediate  
34 pretest likelihood by risk stratification and in whom a non-coronary cause of the chest pain has been  
35 excluded, should be referred for a coronary CT angiography. In the present study we found that patients  
36 referred for early further work up, had a one-year event rate of 5 %, as opposed to the approximately 1 %  
37 demonstrated in NSCP patients, who from a clinical point of view did not require additional early diagnostic  
38 work up. Thus, the current clinical assessment when it comes to risk stratification to distinguish the  
39 patients who need further investigations from the NSCP patients seems to be efficient. The differences in  
40 characteristics between those referred for further investigations and those included in our study (without  
41 referral at index contact) are however not further elucidated in this study.

42  
43  
44  
45  
46  
47  
48 It is not possible to conclude on the prognostic value of CAC in predicting adverse cardiac event due to the  
49 low number of event in our study, the short follow up time and small number of participants. However the  
50 two patients in the NSCP study population experiencing a clinical event had a very high CAC score,  
51 respectively 349 and 2595, and were known with three risk factors for CVD (hypertension,  
52 hypercholesterolemia and a family history of CVD). This is in agreement with numerous previous studies  
53  
54  
55  
56  
57  
58  
59  
60

1  
2  
3  
4 showing that high CAC score is major and independent risk factor (20). In concordance with previous  
5 studies we found a very low event rate in patients without CAC (21). In the NSCP population no events  
6 among patients with a CAC=0 was observed, while one person in background population with CAC=0  
7 experienced VT.  
8  
9

10  
11 The NSCP population comprised more patients with hypercholesterolemia vs background population  
12 (43% vs 18%). We know from previous studies that NSCP is associated with more frequent contacts to the  
13 health care system and use of medication than the background population (22). This could partially explain  
14 that more patients in this group could have been diagnosed with hypercholesterolemia.  
15  
16  
17

### 18 19 **Strengths /Limitations** 20

21 The outcome data collected from the Danish registries are well documented and validated, which adds  
22 strength to this study (23, 24). The participating patients included in this study and background population  
23 might be healthier than the non-participants as in clinical trials the latter are at higher risk and have worse  
24 outcomes than participants (25). The NSCP patients and the background population were preselected as we  
25 excluded individuals without risk factors and patients with known CAD and coronary angiography within  
26 the last 5 years. Thereby the results are not applicable to very low risk and high risk patients. We know  
27 from previous validation studies that the self-reported data for CVD is under reported and inaccurate  
28 compared to measured data (26, 27). A sensitivity of 84.5% has been shown for hypertension,  
29 hypercholesterolemia and diabetes (26). This could have influence the selection of our patients, since  
30 presence of risk factors were one of our inclusion criteria. Patients who at index admission were referred  
31 for further investigations were not included in this study. They could have a higher prevalence of CAC which  
32 cannot be accounted for in this study.  
33  
34  
35  
36  
37  
38  
39

40 The definitions of risk factors were not similar. Family history was limited by age in the DanRisk study while  
41 no age limitation existed in NSCP patients, and that could explain the higher proportion of patients with  
42 family history of CAD among NSCP patients. The data gathering furthermore differed, as NSCP patients  
43 were acutely admitted and values extracted from an acute setting, while DanRisk patients were  
44 investigated in a baseline examination. E.g. the blood pressures were not obtained uniformly and thus not  
45 comparable.  
46  
47  
48

49 The different scanners and protocols used might have had an effect on the presence of CAC. However, the  
50 centers and scanners used for the CAC assessment in the NSCP patients and background population were  
51 almost the same and comparable for that reason.  
52  
53  
54  
55  
56  
57  
58  
59  
60

1  
2  
3  
4 Finally, the study is underpowered to show any differences in events. Thus, the study is an observational  
5 study on the prevalence of CAC in NSCP patients.  
6  
7

### 8 **Conclusion**

9  
10 Based on the results of this study the presence of CAC in NSCP patients does not differ significantly from  
11 what is found in the background population, when adjusted for traditionally risk factors. Thus, a little more  
12 than half of the NSCP patients have detectable CAC on a cardiac CT scan. The prognosis in NSCP patients  
13 seems to be as good as in the background population with a combined event rate of less than 1%.  
14  
15  
16  
17

### 18 **Contributorship**

19 The steering committee (NI, HM, AL, AD, CBM) designed the trial. NI and CBM obtained funding. The  
20 investigators (JL, FH, RA, JB, NPS, MHG) trained the staff and gathered data. NI, AD, MHG and CBM analysed  
21 the data. NI, CBM, HM, AL and AD wrote the report. All authors, can take responsibility for the integrity of  
22 the data and the accuracy of the data analysis, contributed to the implementation of the study, data  
23 interpretation and approved the final report for publication.  
24  
25  
26  
27  
28

### 29 **Data sharing**

30 No additional data available.  
31  
32  
33

### 34 **Conflict of interests**

35 All authors have completed the Unified Competing Interest form at [www.icmje.org/coi\\_disclosure.pdf](http://www.icmje.org/coi_disclosure.pdf)  
36 (available on request from the corresponding author) and declare that (1) no authors have support from  
37 any company for the submitted work. (2) no authors have relationships with companies that might have an  
38 interest in the submitted work in the previous 3 years; (3) their spouses, partners, or children have no  
39 financial relationships that may be relevant to the submitted work; and (4) no authors have non-financial  
40 interests that may be relevant to the submitted work.  
41  
42  
43  
44  
45

### 46 **Figure legends**

47 Figure 1: Flowchart fir the inclusion of NSCP patients

48 Figure 2: Flowchart for inclusion of the background population  
49  
50  
51  
52

### 53 **Funding**

54  
55  
56  
57  
58  
59  
60

1  
2  
3  
4 This study was funded by the Region of southern Denmark, Hospital of Southern Denmark, The University  
5 of Southern Denmark and Knud and Edith Eriksens memory foundation.  
6  
7

### 8 **Acknowledgement** 9

10 We are indebted to the staff involved in the project at the Department of Cardiology and Nuclear medicine,  
11 Odense University Hospital, the Department of Cardiology, Vejle Hospital, the Department of Cardiology  
12 and Radiology, Svendborg Hospital and the Department of Cardiology, Hospital of Southern Denmark .  
13  
14  
15  
16  
17  
18  
19  
20  
21  
22  
23  
24  
25  
26  
27  
28  
29  
30  
31  
32  
33  
34  
35  
36  
37  
38  
39  
40  
41  
42  
43  
44  
45  
46  
47  
48  
49  
50  
51  
52  
53  
54  
55  
56  
57  
58  
59  
60

For peer review only



## References

1. Nichols M, Townsend N, Scarborough P, Rayner M. Cardiovascular disease in Europe 2014: epidemiological update. *Eur Heart J*. 2014;35(42):2950-9.
2. Fihn SD, Gardin JM, Abrams J, Berra K, Blankenship JC, Dallas AP, et al. 2012 ACCF/AHA/ACP/AATS/PCNA/SCAI/STS Guideline for the diagnosis and management of patients with stable ischemic heart disease: a report of the American College of Cardiology Foundation/American Heart Association Task Force on Practice Guidelines, and the American College of Physicians, American Association for Thoracic Surgery, Preventive Cardiovascular Nurses Association, Society for Cardiovascular Angiography and Interventions, and Society of Thoracic Surgeons. *J Am Coll Cardiol*. 2012;60(24):e44-e164.
3. Benjamin EJ, Blaha MJ, Chiuve SE, Cushman M, Das SR, Deo R, et al. Heart Disease and Stroke Statistics-2017 Update: A Report From the American Heart Association. *Circulation*. 2017;135(10):e146-e603.
4. Nowak R, Mueller C, Giannitsis E, Christ M, Ordonez-Llanos J, DeFilippi C, et al. High sensitivity cardiac troponin T in patients not having an acute coronary syndrome: results from the TRAPID-AMI study. *Biomarkers : biochemical indicators of exposure, response, and susceptibility to chemicals*. 2017:1-6.
5. Bhuiya FA, Pitts SR, McCaig LF. Emergency department visits for chest pain and abdominal pain: United States, 1999-2008. *NCHS data brief*. 2010(43):1-8.
6. Fass R, Achem SR. Noncardiac chest pain: epidemiology, natural course and pathogenesis. *Journal of neurogastroenterology and motility*. 2011;17(2):110-23.
7. Omstedt A, Hoijer J, Djarv T, Svensson P. Hypertension predicts major adverse cardiac events after discharge from the emergency department with unspecified chest pain. *Eur Heart J Acute Cardiovasc Care*. 2016;5(5):441-8.
8. Goodacre S, Cross E, Arnold J, Angelini K, Capewell S, Nicholl J. The health care burden of acute chest pain. *Heart*. 2005;91(2):229-30.
9. Khot UN, Khot MB, Bajzer CT, Sapp SK, Ohman EM, Brener SJ, et al. Prevalence of conventional risk factors in patients with coronary heart disease. *Jama*. 2003;290(7):898-904.
10. Agatston AS, Janowitz WR, Hildner FJ, Zusmer NR, Viamonte M, Jr., Detrano R. Quantification of coronary artery calcium using ultrafast computed tomography. *J Am Coll Cardiol*. 1990;15(4):827-32.
11. Messenger B, Li D, Nasir K, Carr JJ, Blankstein R, Budoff MJ. Coronary calcium scans and radiation exposure in the multi-ethnic study of atherosclerosis. *Int J Cardiovasc Imaging*. 2016;32(3):525-9.
12. Thygesen K, Alpert JS, Jaffe AS, Simoons ML, Chaitman BR, White HD. Third universal definition of myocardial infarction. *Nature reviews Cardiology*. 2012;9(11):620-33.
13. Montalescot G, Sechtem U, Achenbach S, Andreotti F, Arden C, Budaj A, et al. 2013 ESC guidelines on the management of stable coronary artery disease: the Task Force on the management of stable coronary artery disease of the European Society of Cardiology. *Eur Heart J*. 2013;34(38):2949-3003.
14. Joshi PH, Blaha MJ, Blumenthal RS, Blankstein R, Nasir K. What is the role of calcium scoring in the age of coronary computed tomographic angiography? *Journal of nuclear cardiology : official publication of the American Society of Nuclear Cardiology*. 2012;19(6):1226-35.
15. Joshi PH, Patel B, Blaha MJ, Berry JD, Blankstein R, Budoff MJ, et al. Coronary artery Calcium predicts Cardiovascular events in participants with a low lifetime risk of Cardiovascular disease: The Multi-Ethnic Study of Atherosclerosis (MESA). *Atherosclerosis*. 2016;246:367-73.
16. Budoff MJ, McClelland RL, Nasir K, Greenland P, Kronmal RA, Kondos GT, et al. Cardiovascular events with absent or minimal coronary calcification: the Multi-Ethnic Study of Atherosclerosis (MESA). *Am Heart J*. 2009;158(4):554-61.
17. Diederichsen AC, Sand NP, Norgaard B, Lambrechtsen J, Jensen JM, Munkholm H, et al. Discrepancy between coronary artery calcium score and HeartScore in middle-aged Danes: the DanRisk study. *Eur J Prev Cardiol*. 2012;19(3):558-64.

- 1  
2  
3  
4 18. Laudon DA, Behrenbeck TR, Wood CM, Bailey KR, Callahan CM, Breen JF, et al. Computed  
5 tomographic coronary artery calcium assessment for evaluating chest pain in the emergency department:  
6 long-term outcome of a prospective blind study. *Mayo Clin Proc.* 2010;85(4):314-22.
- 7 19. Raff GL, Chinnaiyan KM, Cury RC, Garcia MT, Hecht HS, Hollander JE, et al. SCCT guidelines on  
8 the use of coronary computed tomographic angiography for patients presenting with acute chest pain to  
9 the emergency department: a report of the Society of Cardiovascular Computed Tomography Guidelines  
10 Committee. *Journal of cardiovascular computed tomography.* 2014;8(4):254-71.
- 11 20. Greenland P, LaBree L, Azen SP, Doherty TM, Detrano RC. Coronary artery calcium score  
12 combined with Framingham score for risk prediction in asymptomatic individuals. *Jama.* 2004;291(2):210-5.
- 13 21. Chaikriangkrai K, Palamaner Subash Shantha G, Jhun HY, Ungprasert P, Sigurdsson G, Nabi F,  
14 et al. Prognostic Value of Coronary Artery Calcium Score in Acute Chest Pain Patients Without Known  
15 Coronary Artery Disease: Systematic Review and Meta-analysis. *Annals of emergency medicine.* 2016.
- 16 22. Roll M, Rosenqvist M, Sjoborg B, Wettermark B. Unexplained acute chest pain in young  
17 adults: disease patterns and medication use 25 years later. *Psychosomatic medicine.* 2015;77(5):567-74.
- 18 23. Lynge E, Sandegaard JL, Rebolj M. The Danish National Patient Register. *Scandinavian journal*  
19 *of public health.* 2011;39(7 Suppl):30-3.
- 20 24. Pedersen CB. The Danish Civil Registration System. *Scandinavian journal of public health.*  
21 *2011;39(7 Suppl):22-5.*
- 22 25. Bahit MC, Cannon CP, Antman EM, Murphy SA, Gibson CM, McCabe CH, et al. Direct  
23 comparison of characteristics, treatment, and outcomes of patients enrolled versus patients not enrolled in  
24 a clinical trial at centers participating in the TIMI 9 Trial and TIMI 9 Registry. *Am Heart J.* 2003;145(1):109-  
25 17.
- 26 26. Dey AK, Alyass A, Muir RT, Black SE, Swartz RH, Murray BJ, et al. Validity of Self-Report of  
27 Cardiovascular Risk Factors in a Population at High Risk for Stroke. *Journal of stroke and cerebrovascular*  
28 *diseases : the official journal of National Stroke Association.* 2015;24(12):2860-5.
- 29 27. Bowlin SJ, Morrill BD, Nafziger AN, Lewis C, Pearson TA. Reliability and changes in validity of  
30 self-reported cardiovascular disease risk factors using dual response: the behavioral risk factor survey. *J Clin*  
31 *Epidemiol.* 1996;49(5):511-7.
- 32  
33  
34  
35  
36  
37  
38  
39  
40  
41  
42  
43  
44  
45  
46  
47  
48  
49  
50  
51  
52  
53  
54  
55  
56  
57  
58  
59  
60

1  
2  
3  
4  
5  
6  
7  
8  
9  
10  
11  
12  
13  
14  
15  
16  
17  
18  
19  
20  
21  
22  
23  
24  
25  
26  
27  
28  
29  
30  
31  
32  
33  
34  
35  
36  
37  
38  
39  
40  
41  
42  
43  
44  
45  
46  
47  
48  
49  
50  
51  
52  
53  
54  
55  
56  
57  
58  
59  
60

Figure 2: Flow chart for the background population represented by the DanRisk study patients.

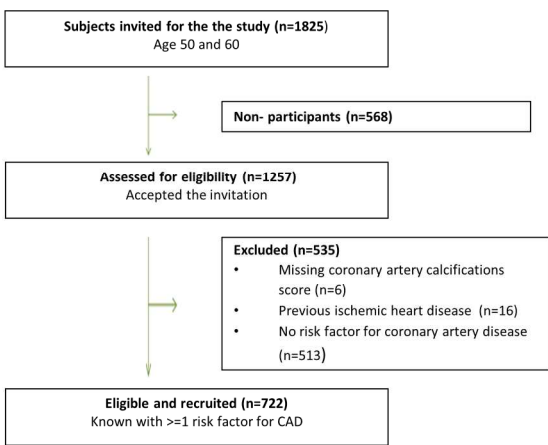

254x338mm (300 x 300 DPI)

Figure 1: Flowchart for the inclusion of the NSCP population

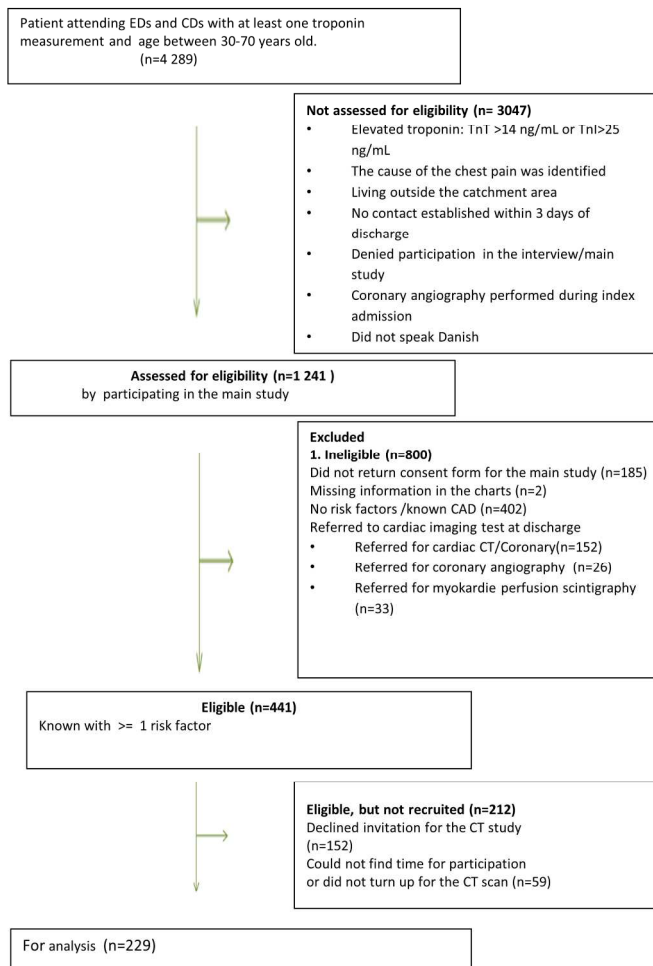

254x338mm (300 x 300 DPI)

## STROBE Statement—checklist of items that should be included in reports of observational studies

|                              | Item No | Recommendation                                                                                                                                                                                                                                                                                                                                                                                                                                                                                                                                                                                                                                                                                              |
|------------------------------|---------|-------------------------------------------------------------------------------------------------------------------------------------------------------------------------------------------------------------------------------------------------------------------------------------------------------------------------------------------------------------------------------------------------------------------------------------------------------------------------------------------------------------------------------------------------------------------------------------------------------------------------------------------------------------------------------------------------------------|
| <b>Title and abstract</b>    | 1       | (a) Indicate the study's design with a commonly used term in the title or the abstract (Page 1)<br>(b) Provide in the abstract an informative and balanced summary of what was done and what was found (page 1)                                                                                                                                                                                                                                                                                                                                                                                                                                                                                             |
| <b>Introduction</b>          |         |                                                                                                                                                                                                                                                                                                                                                                                                                                                                                                                                                                                                                                                                                                             |
| Background/rationale         | 2       | Explain the scientific background and rationale for the investigation being reported (Page 2)                                                                                                                                                                                                                                                                                                                                                                                                                                                                                                                                                                                                               |
| Objectives                   | 3       | State specific objectives, including any prespecified hypotheses (Page 3)                                                                                                                                                                                                                                                                                                                                                                                                                                                                                                                                                                                                                                   |
| <b>Methods</b>               |         |                                                                                                                                                                                                                                                                                                                                                                                                                                                                                                                                                                                                                                                                                                             |
| Study design                 | 4       | Present key elements of study design early in the paper (Page 3)                                                                                                                                                                                                                                                                                                                                                                                                                                                                                                                                                                                                                                            |
| Setting                      | 5       | Describe the setting, locations, and relevant dates, including periods of recruitment, exposure, follow-up, and data collection (Page 3-6)                                                                                                                                                                                                                                                                                                                                                                                                                                                                                                                                                                  |
| Participants                 | 6       | (a) <i>Cohort study</i> —Give the eligibility criteria, and the sources and methods of selection of participants. Describe methods of follow-up (Page 3-4)<br><i>Case-control study</i> —Give the eligibility criteria, and the sources and methods of case ascertainment and control selection. Give the rationale for the choice of cases and controls<br><i>Cross-sectional study</i> —Give the eligibility criteria, and the sources and methods of selection of participants<br>(b) <i>Cohort study</i> —For matched studies, give matching criteria and number of exposed and unexposed<br><i>Case-control study</i> —For matched studies, give matching criteria and the number of controls per case |
| Variables                    | 7       | Clearly define all outcomes, exposures, predictors, potential confounders, and effect modifiers. Give diagnostic criteria, if applicable (Page 4)                                                                                                                                                                                                                                                                                                                                                                                                                                                                                                                                                           |
| Data sources/<br>measurement | 8*      | For each variable of interest, give sources of data and details of methods of assessment (measurement). Describe comparability of assessment methods if there is more than one group (Page 4-5)                                                                                                                                                                                                                                                                                                                                                                                                                                                                                                             |
| Bias                         | 9       | Describe any efforts to address potential sources of bias (Page 6)                                                                                                                                                                                                                                                                                                                                                                                                                                                                                                                                                                                                                                          |
| Study size                   | 10      | Explain how the study size was arrived at (Page 6)                                                                                                                                                                                                                                                                                                                                                                                                                                                                                                                                                                                                                                                          |
| Quantitative variables       | 11      | Explain how quantitative variables were handled in the analyses. If applicable, describe which groupings were chosen and why (Page 6)                                                                                                                                                                                                                                                                                                                                                                                                                                                                                                                                                                       |
| Statistical methods          | 12      | (a) Describe all statistical methods, including those used to control for confounding (Page 7)<br>(b) Describe any methods used to examine subgroups and interactions (Page 6-7)<br>(c) Explain how missing data were addressed (Page 4)<br>(d) <i>Cohort study</i> —If applicable, explain how loss to follow-up was addressed<br><i>Case-control study</i> —If applicable, explain how matching of cases and controls was addressed<br><i>Cross-sectional study</i> —If applicable, describe analytical methods taking account of sampling strategy<br>(e) Describe any sensitivity analyses                                                                                                              |

Continued on next page

**Results**

|                          |     |                                                                                                                                                                                                                                                                                                                                                                                                                                    |
|--------------------------|-----|------------------------------------------------------------------------------------------------------------------------------------------------------------------------------------------------------------------------------------------------------------------------------------------------------------------------------------------------------------------------------------------------------------------------------------|
| Participants             | 13* | (a) Report numbers of individuals at each stage of study—eg numbers potentially eligible, examined for eligibility, confirmed eligible, included in the study, completing follow-up, and analysed ( Page 7)<br>(b) Give reasons for non-participation at each stage ( Page 9)<br>(c) Consider use of a flow diagram (Page 9)                                                                                                       |
| Descriptive data         | 14* | (a) Give characteristics of study participants (eg demographic, clinical, social) and information on exposures and potential confounders (Page 10)<br>(b) Indicate number of participants with missing data for each variable of interest (None, missing CAC not included in the study)<br>(c) <i>Cohort study</i> —Summarise follow-up time (eg, average and total amount) (Page 12)                                              |
| Outcome data             | 15* | <i>Cohort study</i> —Report numbers of outcome events or summary measures over time (Page 12-13)<br><i>Case-control study</i> —Report numbers in each exposure category, or summary measures of exposure<br><i>Cross-sectional study</i> —Report numbers of outcome events or summary measures                                                                                                                                     |
| Main results             | 16  | (a) Give unadjusted estimates and, if applicable, confounder-adjusted estimates and their precision (eg, 95% confidence interval). Make clear which confounders were adjusted for and why they were included (Page 12)<br>(b) Report category boundaries when continuous variables were categorized ( Page 12)<br>(c) If relevant, consider translating estimates of relative risk into absolute risk for a meaningful time period |
| Other analyses           | 17  | Report other analyses done—eg analyses of subgroups and interactions, and sensitivity analyses (Page 13)                                                                                                                                                                                                                                                                                                                           |
| <b>Discussion</b>        |     |                                                                                                                                                                                                                                                                                                                                                                                                                                    |
| Key results              | 18  | Summarise key results with reference to study objectives (Page 14)                                                                                                                                                                                                                                                                                                                                                                 |
| Limitations              | 19  | Discuss limitations of the study, taking into account sources of potential bias or imprecision. Discuss both direction and magnitude of any potential bias (Page 15)                                                                                                                                                                                                                                                               |
| Interpretation           | 20  | Give a cautious overall interpretation of results considering objectives, limitations, multiplicity of analyses, results from similar studies, and other relevant evidence (Page 14-15)                                                                                                                                                                                                                                            |
| Generalisability         | 21  | Discuss the generalisability (external validity) of the study results (Page 16)                                                                                                                                                                                                                                                                                                                                                    |
| <b>Other information</b> |     |                                                                                                                                                                                                                                                                                                                                                                                                                                    |
| Funding                  | 22  | Give the source of funding and the role of the funders for the present study and, if applicable, for the original study on which the present article is based (Page 17)                                                                                                                                                                                                                                                            |

\*Give information separately for cases and controls in case-control studies and, if applicable, for exposed and unexposed groups in cohort and cross-sectional studies.

**Note:** An Explanation and Elaboration article discusses each checklist item and gives methodological background and published examples of transparent reporting. The STROBE checklist is best used in conjunction with this article (freely available on the Web sites of PLoS Medicine at <http://www.plosmedicine.org/>, Annals of Internal Medicine at <http://www.annals.org/>, and Epidemiology at <http://www.epidem.com/>). Information on the STROBE Initiative is available at [www.strobe-statement.org](http://www.strobe-statement.org).

# BMJ Open

## The Prevalence of Coronary Artery Calcification in a Non-Specific Chest Pain Population in Emergency and Cardiology Departments compared to the Background Population – a Prospective Cohort Study in Southern Denmark with 12-month Follow-up of Cardiac Endpoints.

|                                 |                                                                                                                                                                                                                                                                                                                                                                                                                                                                                                                                                                                                                                                                                                                                                                                                             |
|---------------------------------|-------------------------------------------------------------------------------------------------------------------------------------------------------------------------------------------------------------------------------------------------------------------------------------------------------------------------------------------------------------------------------------------------------------------------------------------------------------------------------------------------------------------------------------------------------------------------------------------------------------------------------------------------------------------------------------------------------------------------------------------------------------------------------------------------------------|
| Journal:                        | <i>BMJ Open</i>                                                                                                                                                                                                                                                                                                                                                                                                                                                                                                                                                                                                                                                                                                                                                                                             |
| Manuscript ID                   | bmjopen-2017-018391.R2                                                                                                                                                                                                                                                                                                                                                                                                                                                                                                                                                                                                                                                                                                                                                                                      |
| Article Type:                   | Research                                                                                                                                                                                                                                                                                                                                                                                                                                                                                                                                                                                                                                                                                                                                                                                                    |
| Date Submitted by the Author:   | 19-Dec-2017                                                                                                                                                                                                                                                                                                                                                                                                                                                                                                                                                                                                                                                                                                                                                                                                 |
| Complete List of Authors:       | Ilangkovan, Nivethitha; Hospital of Southern Denmark, Department of Cardiology<br>Mogensen, Christian; Hospital of Southern Denmark, Emergency Department<br>Mickley, Hans; Odense Universitetshospital, Cardiology<br>Lassen, Annmarie; Odense University Hospital, Department of Emergency Medicine<br>Lambrechtsen, Jess; Odense University Hospital, Department of Medicine<br>Sand, Niels Peter; Esbjerg Hiospital, Cardiology<br>Albiniussen, Rasmus; Hospital of Southern Denmark, Department of Cardiology<br>Byg, Jorgen; Hospital of Southern Denmark, Department of Cardiology<br>Hald, Flemming; Vejle Hospital, Department of cardiology<br>Grønhøj, Mette; Odense Universitetshospital, Department of cardiology<br>Diederichsen, Axel; Odense Universitetshospital, Department of Cardiology |
| <b>Primary Subject Heading</b>: | Cardiovascular medicine                                                                                                                                                                                                                                                                                                                                                                                                                                                                                                                                                                                                                                                                                                                                                                                     |
| Secondary Subject Heading:      | Emergency medicine, Diagnostics                                                                                                                                                                                                                                                                                                                                                                                                                                                                                                                                                                                                                                                                                                                                                                             |
| Keywords:                       | Coronary heart disease < CARDIOLOGY, Coronary intervention < CARDIOLOGY, Ischaemic heart disease < CARDIOLOGY, Myocardial infarction < CARDIOLOGY, Cardiovascular imaging < RADIOLOGY & IMAGING, Computed tomography < RADIOLOGY & IMAGING                                                                                                                                                                                                                                                                                                                                                                                                                                                                                                                                                                  |
|                                 |                                                                                                                                                                                                                                                                                                                                                                                                                                                                                                                                                                                                                                                                                                                                                                                                             |

SCHOLARONE™  
Manuscripts

1  
2  
3  
4 **The Prevalence of Coronary Artery Calcification in a Non-Specific Chest Pain**  
5 **Population in Emergency and Cardiology Departments compared to the**  
6 **Background Population**  
7  
8  
9  
10 **– a Prospective Cohort Study in Southern Denmark with 12-month Follow-up of**  
11 **Cardiac Endpoints.**  
12  
13

14  
15  
16 Nivethitha Ilangkovan<sup>1</sup>, Christian Backer Mogensen<sup>2</sup>, Hans Mickley<sup>3</sup>, Annmarie Lassen<sup>4</sup>, Jess Lambrechtsen<sup>5</sup>, Niels  
17 Peter Sand<sup>6</sup>, Rasmus Albinussen<sup>1</sup>, Jørgen Byg<sup>1</sup>, Flemming Hald<sup>7</sup>, Mette Hjortdal Grønhoj<sup>3</sup>, Axel Diederichsen<sup>3</sup>  
18

19  
20 1 Cardiology Department, Hospital of Southern Denmark, Aabenraa, Denmark.

21 2. Emergency Department, Hospital of Southern Denmark, Aabenraa, Denmark.

22 3. Cardiology Department, Odense University Hospital, Odense, Denmark.

23 4. Emergency Department, Odense University Hospital, Odense, Denmark.

24 5. Medical Department, Svendborg Hospital, Svendborg, Denmark.

25 6. Cardiology Department, Esbjerg Hospital, Esbjerg, Denmark.

26 7. Cardiology Department, Vejle Hospital, Vejle, Denmark.  
27

28  
29 Corresponding author

30 Nivethitha Ilangkovan

31 Email: [nilangkovan@gmail.com](mailto:nilangkovan@gmail.com)

32 Kresten Philipsens vej 15, 6200 Aabenraa

33 Denmark  
34  
35

## 36 **Abstract**

37  
38 Objectives: To examine and compare the prevalence of Coronary Artery Calcification (CAC) and the  
39 frequency of cardiac events in a background population and a cohort of Non-Specific Chest Pain (NSCP)  
40 patients who present to an emergency or cardiology department and are discharged without an obvious  
41 reason for their symptom.  
42

43  
44 Design: A double-blinded, prospective, observational cohort study that measures both CT-determined CAC  
45 scores and cardiac events after one year of follow-up.  
46

47 Setting: Emergency and cardiology departments in the Region of Southern Denmark.  
48

49 Subjects: In total, 229 NSCP patients were compared with 722 patients from a background comparator  
50 population.  
51

52 Main outcomes measures: Prevalence of CAC and incidence of unstable angina (UAP), acute myocardial  
53 infarction (MI), ventricular tachycardia (VT), coronary revascularization, and cardiac-related mortality one  
54 year after index contact.  
55  
56  
57



1  
2  
3  
4 Results: There was no significant difference in the prevalence of CAC [odds ratio (OR) 0.9 (95% CI: 0.6-1.3),  
5 p=0.546] or the frequency of cardiac endpoints (p=0.64) between the studied groups. When compared with  
6 the background population, the OR for NSCP patients for a CAC > 100 AU was 1.0 (95% CI:0.6-1.5), p=0.826.  
7 During one year of follow-up, two (0.9%) NSCP patients underwent cardiac revascularization, while none  
8 experienced UAP, MI, VT, or death. In the background population, four (0.6%) participants experienced a  
9 clinical cardiac endpoint; two had an MI, one had VT, and one had a cardiac-related death.

10  
11 Conclusion: The prevalence of CAC (CAC > 0 AU) among NSCP patients is comparable to a background  
12 population and there is a low risk of a cardiac event in the first year after discharge. A CAC study does not  
13 provide notable clinical utility for risk stratifying NSCP patients.  
14  
15  
16  
17  
18  
19

### 20 **Strength and limitations**

- 21 • The patients were unselected.
- 22 • The patients were included from six hospitals.
- 23 • The number of participants was relatively small.
- 24 • No patients were lost to follow-up.
- 25 • Few events occurred during follow-up.
- 26
- 27
- 28
- 29
- 30
- 31

### 32 **Introduction**

33 Cardiovascular disease (CVD) is a major public health problem and the most common cause of death among  
34 men and women in Europe and the United State (1-3). Less than one in five patients presenting to the  
35 emergency department with chest pain have acute myocardial infarction (MI) (4, 5). Other potential causes  
36 for their symptoms include non-ischemic cardiac disease (aneurysm, aortic dissection, or pulmonary  
37 embolism) and non-cardiac disease (respiratory, gastrointestinal, or musculoskeletal disorders). However,  
38 for a significant number of patients the cause of symptoms is unclear; such patients are defined as having  
39 Non-Specific Chest Pain (NSCP) (6). For these patients, the exclusion of acute MI in an acute care setting  
40 does not rule out underlying coronary artery disease (CAD) or the associated risk of future cardiac events,  
41 as demonstrated by studies showing that 0.8%-2.1% of patients evaluated for MI and discharged from  
42 emergency departments have an adverse cardiac outcome in the first 30 days after discharge (7, 8).  
43  
44  
45  
46  
47  
48  
49

50  
51 Up to 20% of patients with CAD do not have the traditional CVD risk factors of hypertension,  
52 hyperlipidemia, diabetes, or smoking (9). Consequently, there is a need to identify diagnostic tools that can  
53 be used to risk stratify patients with chest pain, particularly in an acute care setting. A non-contrast cardiac  
54  
55  
56  
57  
58  
59  
60

1  
2  
3  
4 CT can be used to measure the presence and extent of coronary artery calcium (CAC) and might serve as  
5 one such tool. As a diagnostic test, it offers the advantages of easy performance, simple interpretation, and  
6 high reproducibility, while exposing patients to relatively low levels of radiation (10-13). While it has been  
7 evaluated as a risk stratification tool in asymptomatic individuals – and demonstrated a CAC prevalence of  
8 44%-50% (14, 15) – its role in patients with NSCP remains uninvestigated.  
9

10  
11  
12  
13 In order to evaluate the role of non-contrast cardiac CT as a risk stratification tool for patients with NSCP,  
14 this study had two goals. The first was to identify the prevalence of CAC among NSCP patients discharged  
15 from emergency and cardiology departments, and compare these findings with observations from an  
16 asymptomatic background population. The second was to examine the frequency of clinical cardiac events  
17 in NSCP patients during a 12-month follow-up period, and compare that data with results from an  
18 asymptomatic background population and from a population of higher-risk NSCP patients who are referred  
19 for further cardiac testing after index contact.  
20  
21  
22  
23  
24

## 25 26 **Method and materials**

### 27 **Study design**

28  
29 The study was a double-blinded, prospective, observational cohort study. It included patients from  
30 emergency and cardiology departments in the Region of Southern Denmark, specifically in the cities of  
31 Odense, Svendborg, Vejle, Kolding, Aabenraa, and Sonderborg. Patients were enrolled between September  
32 2014 and May 2015 provided they met the following inclusion criteria: they presented to hospital with  
33 acute chest pain and a suspicion of cardiac ischemia; they were admitted to hospital; they had at least one  
34 troponin measurement; they were discharged with a diagnosis of observation for myocardial infarction or  
35 chest pain (ICD10 codes: DR072/DR073/DR034/DR035); and there was no identifiable cause for their chest  
36 pain. An additional inclusion criteria was the presence of at least one known risk factor for CAD (current  
37 smoker, hypertension, hypercholesterolemia, diabetes mellitus, or significant family history of CVD).  
38  
39  
40  
41  
42  
43  
44

45  
46 Patients were excluded from the study if they were referred for out-patient cardiac imaging test after the  
47 index visit, lived outside the catchment area (Region of Southern Denmark), were unable to speak Danish,  
48 declined to either complete a telephone interview and/or undergo a CT scan, or had a previous history of  
49 CAD as defined by previous MI or coronary revascularization (Figure 1).  
50  
51  
52

### 53 **Study population**

1  
2  
3  
4 The study population was identified by performing a daily search of troponin values in the central  
5 biochemical laboratory, which stores results for the region of Southern Denmark. Electronic patient files for  
6 any emergency or cardiology department patients between the ages of 30-70 were reviewed, and patients  
7 with normal troponin values, as defined by a high sensitivity troponin T  $\leq 14$  ng/L or a high sensitivity  
8 troponin I  $< 25$  ng/L, were assessed for study eligibility. Provided they met eligibility criteria they completed  
9 a structured telephone questionnaire within three days of discharge from index contact. Thereafter,  
10 consent forms and study information were sent out. Those patients who returned the consent form were  
11 scheduled for a non-contrast CT scan, the results of which were blinded to participants and investigators  
12 until the conclusion of the study.  
13  
14  
15  
16  
17  
18

19 For comparison purposes, we used the Danish Risk Score study (DanRisk) population (15) as a background  
20 comparator group. The DanRisk study population included 1,257 asymptomatic subjects, age 50-60 years,  
21 who were examined in one of four cardiac computer tomography (CT) centers in the Region of Southern  
22 Denmark (Odense, Esbjerg, Vejle, or Svendborg). From this study population, we excluded asymptomatic  
23 individuals without risk factors for CAD (hypertension, hypercholesterolemia, familiar disposition, known  
24 smoker and diabetes mellitus), individuals with known CAD, and those missing CAC scores. The remaining  
25 group of individuals comprised the comparator group.  
26  
27  
28  
29  
30  
31

### 32 **Definitions**

33 Comorbidity in the NSCP population was self-reported. Individuals were considered to have diabetes  
34 mellitus if they used an anti-diabetic medication or had been given a diagnosis of diabetes mellitus by their  
35 general practitioner. Similarly, hypertension and hypercholesterolemia were considered present if  
36 participants used medications to treat either disease or if they had received a diagnosis of either illness.  
37 Family history was defined as a first degree relative with CVD regardless of age of onset, while smoking was  
38 defined by current smoking status. The first blood pressure and heart rate values taken during the index  
39 admission were retrieved from patient files. Cholesterol values were collected up to three months before  
40 and three months after the index admission, with the value closest to the index date selected for the study.  
41 BMI was calculated based on self-reported height and weight.  
42  
43  
44  
45  
46  
47  
48

49 In the background comparator group, individuals were considered to have diabetes mellitus, hypertension,  
50 or hypercholesterolemia if they used an anti-diabetic, hypertension, or cholesterol-lowering medication,  
51 respectively. Family history was defined by the presence of CVD in a male first degree relative  $< 55$  years or  
52 a female first degree relative  $< 65$  years. Smoking was based on smoking status at the time the study was  
53  
54  
55  
56  
57  
58

1  
2  
3  
4 conducted. Blood pressure, heart rate, BMI, and cholesterol values were measured during baseline  
5 examination.  
6  
7

### 8 **Troponins**

9  
10 Troponin I, used by Odense University Hospital, was analysed using the Abbot Diagnostics Architect with an  
11 upper reference limit of 99<sup>th</sup> percentile for 24 ng/L and a coefficient variation < 10% at 5 ng/L. The decision  
12 limit for MI was set at  $\geq 25$  ng/L.  
13  
14

15  
16 Troponin T, used by the other participating hospitals, was analysed by Roche Diagnostic Elecsys 2010,  
17 modular analytics E170, Cobas e411, Cobas e601. The 99<sup>th</sup> percentile upper reference limit was 14 ng/L,  
18 with a coefficient variation < 10% at 13 ng/L and a decision limit for MI set at > 14 ng/L.  
19  
20

### 21 **Cardiac CT protocol**

22  
23 CAC was measured by summing the scores for calcific foci in the coronary arteries, and then expressing the  
24 total calcium burden in Agatston units (AU) (10). CAC was assessed by trained radiographers. In an  
25 additional 52 subjects the CAC score was reanalysed by the first author.  
26  
27

28  
29 Two centers used a dual-source CT scanner (SOMATOM Definition Flash, Siemens Healthcare, Forchheim,  
30 Germany) with prospective ECG triggering. In participants with a heart rate <75 bpm, ECG triggering was set  
31 during the diastolic phase at 65-75% of the cardiac R-R interval, while in persons with a heart rate  $\geq 75$  bpm  
32 ECG triggering was set during the systolic phase at 250-400 ms. Additional CT settings included the  
33 following: sequential prospective scan, slice thickness 3 mm, collimation 128 x 0.6 mm, gantry rotation time  
34 0.28 ms, 120 kV tube voltage, and 90 mAs/rotation.  
35  
36

37  
38 One center used a GE 64-slice CT-scanner (Discovery 750 HD; GE Healthcare, USA). In individuals with heart  
39 rates <75 bpm, ECG triggering was set in diastolic phase at 75% of the cardiac R-R interval, and in those  
40 with heart rates  $\geq 75$  bpm it was set in the systolic phase at 40% of the cardiac R-R interval. Other settings in  
41 this center included: sequential prospective scan, slice thickness 2.5 mm, collimation 64 x 0.625 mm, gantry  
42 rotation time 0.35 ms, 120 kV tube voltage, and a 200 mA tube current.  
43  
44

45  
46 Finally, one center used a Toshiba Aquillion ONE CT scanner (Toshiba Medical systems, Japan) with  
47 prospective ECG triggering. If the heart rate was <75 bpm, then ECG triggering was in the diastolic phase  
48 at 65%-75% of the R-R interval and if the heart rate was  $\geq 75$  bpm then ECG triggering was set in the systolic  
49  
50

1  
2  
3  
4 phase at 40%. Additional settings were: sequential prospective scan, slice thickness 0.5 mm, collimation 0.5  
5 mm x 240 – 320, gantry rotation time 0.275 ms, and 120 kV tube voltage.  
6  
7

### 8 **Follow-up**

9  
10 The study was double blinded with a 12 month follow-up. Neither participants nor investigators knew the  
11 results of the CAC score until the end of follow-up, at which time participants and their general practitioner  
12 received a letter with the results of testing.  
13  
14

15  
16 The clinical endpoints at follow-up were unstable angina (UAP), non-fatal MI, ventricular tachycardia (VT),  
17 coronary revascularization, and cardiac death. The endpoints were compared with the control population  
18 and with NSCP patients who were referred for cardiac imaging testing at the index admission, but who  
19 consequently did not participate in the study.  
20  
21  
22

### 23 **Sample size**

24  
25 A sample size calculation was performed before the study. The prevalence of an elevated CAC score (CAC >  
26 0 AU) in the DanRisk comparator population was 44% (15). We assumed that the prevalence of CAC scores  
27 in our symptomatic low risk population would be 18% higher (or 62%), since previous studies found that  
28 79% of symptomatic individuals referred for coronary angiography have a CAC > 0 AU (16). Using the Fleiss  
29 method, we calculated that we required a sample size of at least 238 patients if we were to detect a risk  
30 factor with an OR of at least 2.1, a significance level of 95%, a power of 80%, and a ratio of 1 for  
31 exposed/non-exposed.  
32  
33  
34  
35  
36  
37

### 38 **Statistical analyses**

39  
40 Categorical variables are presented with frequency tables and percentages with the distributions of  
41 continuous variables evaluated by empirical histograms. Normally distributed continuous variables are  
42 presented as mean and standard deviation (SD) values, whereas skewed distributed continuous variables  
43 are presented with their median and interquartile range (IQR). Fischer's exact test and the Chi square test  
44 were used for categorical variables, a t-test was used to compare normally distributed variables, and the  
45 Wilcoxon's rank sum test was used for skewed distributed variables. NSCP patients and the control  
46 population were compared using a multivariate analysis that included traditional CVD risk factors (gender,  
47 age, smoking, hypertension, hypercholesterolemia, diabetes mellitus, a family history of CVD, and BMI), the  
48 prevalence of CAC (the dependent variable) > 0 and CAC >= 100. The correlation coefficient was 99%.  
49 Analyses were performed with STATA SE 14 (StataCorp, College Station, TX, USA). A two-sided P-value <  
50 0.05 was considered statistically significant.  
51  
52  
53  
54  
55  
56  
57  
58  
59  
60

## Ethics

The study protocol was approved by the Regional Scientific Ethical Committee for Southern Denmark (S-20140055) and conducted in accordance with the Declaration of Helsinki. The study was registered with ClinicalTrials.gov (NCT02422316) and the Danish Data Protection Agency (2008-58-0035 no 1092). Written informed consent was obtained from participating individuals.

The DanRisk protocol was approved by the Regional Scientific Ethical Committee for Southern Denmark (S-20080140) and was conducted in accordance with the Declaration of Helsinki. Written informed consent was obtained from participating individuals.

## Results

In total there were 4,289 patients, 30 to 70 years old, who were seen in either an emergency or cardiology department, and who had at least one troponin measurement. Among these patients, 3,047 were not assessed for study eligibility on the basis of one or more criteria (see Figure 1). Of the remaining 1,241 patients, 800 were assessed for study eligibility, but excluded based on the presence of one or more exclusion criteria. From the residual 441 patients, 229 participated in the study and underwent a cardiac CT scan, while the remaining 212 patients, who were classified as non-participants, either declined study participation or failed to undergo a cardiac CT-scan.

Comparing participants with non-participants, it can be seen that the mean age was respectively 57 years (95% CI; 56-58) and 52 years (95% CI: 50-53), with a  $p=0.001$ . Significantly more participants had hypercholesterolemia and a family history of CVD compared with non-participants, while no significant differences were found in gender, diabetes, hypertension, or smoking status (Table 1).

Table 1 : Characteristics of participants and non-participants

|                      | Participants<br>n=229 | Non-participants<br>n=212 | P-value |
|----------------------|-----------------------|---------------------------|---------|
| Age (years)          | 57 (56-58)            | 52 (50-53)                | 0.001   |
| Male                 | 98 (43)               | 89 (42)                   | 0.86    |
| Diabetes mellitus    | 22 (10)               | 10 (5)                    | 0.048   |
| Hypertension         | 91 (40)               | 70 (33)                   | 0.14    |
| Hypercholesterolemia | 97 (42)               | 67 (32)                   | 0.02    |
| Family history       | 124 (54)              | 93 (44)                   | 0.03    |
| Smoking              | 58 (25)               | 57 (27)                   | 0.71    |

Values are n (%) or mean (95%CI)

Figure 2 shows the selection of the control group. Of the 1,825 randomly selected individuals 50 or 60 years old who were invited to participate in the DanRisk study, there were 1,257 who accepted the invitation. Based on the criteria established for this study, a total of 535 individuals were excluded from participation, of whom 513 did not fulfill the inclusion criteria of having at least one risk factor, 16 patients had known CAD, and 6 did not have a CAC score. The background comparison group was thus composed of the residual 722 individuals.

Table 2 lists the characteristics of NSCP patients and the background comparison group. Mean age for the NSCP population was 57 years, compared with 55 years for the DanRisk group ( $p=0.007$ ). A significantly higher proportion of NSCP patients had known hypercholesterolemia and a family history of cardiovascular disease, while more participants in the comparison group were smokers. Furthermore, significant differences were found between the populations with respect to blood pressure, heart rate, and total cholesterol.

Table 2: Descriptive characteristics of Non-Specific Chest Pain patients and the background population.

|                                          | NSCP patients<br>n=229 (%) | Background<br>population<br>n=722 (%) | P-value |
|------------------------------------------|----------------------------|---------------------------------------|---------|
| Male                                     | 98 (43)                    | 295 (45)                              | 0.48    |
| Age                                      | 57 ±9                      | 55 ±5                                 | 0.008   |
| 30-39                                    | 7 (3)                      | -                                     |         |
| 40-49                                    | 46 (20)                    | -                                     |         |
| 50-59                                    | 76 (33)                    | 316 (44)                              | 0.001   |
| 60-70                                    | 100 (44)                   | 406 (56)                              |         |
| Hypertension                             | 91 (40)                    | 266 (37)                              | 0.460   |
| Hypercholesterolemia                     | 97 (42)                    | 126 (18)                              | 0.001   |
| Diabetes                                 | 22 (10)                    | 59 (8)                                | 0.51    |
| Family history of cardiovascular disease | 124 (54)                   | 287 (40)                              | 0.001   |
| Smoking                                  | 58(25)                     | 314(44)                               | 0.001   |
| Previous smoker                          | 74(32)                     | 197(27)                               | 0.142   |
| Non-smoker                               | 97(42)                     | 211(29)                               | 0.001   |
| Systolic blood pressure (mmHg)           | 144 ±30                    | 137 ±19                               | 0.001   |
| Diastolic blood pressure (mmHg)          | 97 ±122                    | 83 ±10                                | 0.002   |
| Heart rate                               | 74 ±14                     | 71 ±14                                | 0.001   |
| Total cholesterol (mmol/L)               | 5.2 ±1.1                   | 5.5 ±1.1                              | 0.005   |
| LDL cholesterol (mmol/L)                 | 3.1 ±0.9                   | 3.2 ±0.9                              | 0.070   |
| HDL cholesterol (mmol/L)                 | 1.4 ±0.5                   | 1.5 ±0.5                              | 0.080   |



|                          |          |          |       |
|--------------------------|----------|----------|-------|
| BMI (kg/m <sup>2</sup> ) | 27 ±6    | 27 ±5    | 0.715 |
| CAC score (AU)           | 2(0:74)  | 1 (0:54) | 0.229 |
| 0                        | 106 (46) | 350 (48) | 0.679 |
| 1-99                     | 74(32)   | 238(33)  | 0.897 |
| ≥ 100                    | 49(22)   | 134(19)  | 0.438 |

Values are n (%), mean ± SD, or median (IQR). NSCP = non-Specific Chest Pain, AU=Agatston unit

The prevalence of the CAC score categories (0 AU, 1-99 AU, ≥100 AU) were similar for the NSCP and background population (46%, 32%, 22% versus 48%, 33%, and 19%, p=0.630), and there was no difference in the median CAC score [2 AU (IQR 0;74 AU) and 1 AU (IQR 0;54 AU), p=0.229]. We analyzed various subgroups, and there were similarly no differences in the median CAC scores for females [0 AU (IQR 0;67 AU) and 0 AU (IQR 0;18 AU), p=0.74], males [18 AU (IQR 0;83 AU) and 9 AU (IQR 0;116 AU), p=0.12], or 50-59 year olds [0 AU (IQR 0;33 AU) and 0 AU (IQR 0;12.5 AU), p=0.25]. However, the subgroup of 60-69 year olds had a higher median CAC score in the NSCP group compared with the background population [47 AU (IQR 0;147 AU) versus 7 AU (IQR 0;110 AU), p=0.008]. In the multivariate logistic regression analysis there was no significant difference in CAC in the NSCP and background population [OR 0.9 (95%CI: 0.6-1.3), p=0.546]. The OR for CAC >100 AU was 1.0 (95% CI:0.6-1.5) p=0.826 (Supplementary Table). In 52 cases, two independent readers performed the CAC score measurement; the Pearson's correlation was 99%.

During one year of follow-up, 2 out of 229 NSCP patients underwent cardiac revascularization, while none had UAP, MI, VT, or death related to cardiac causes. Of the two patients who underwent cardiac revascularization, one was a female age 64 with a CAC score of 340, and the other was a male age 60 years with a CAC score of 2,595. Both were known to have hypertension, hypercholesterolemia, and a significant family history of CVD. The event rate in the background population was 4 out of 722, with all of the involved patients male: two had an MI, one had VT, and one had a cardiac-related death. The patient with VT was 50 years and had a CAC=0, but a significant family history of CVD. The three remaining patients were 60 years old with CAC scores of 166, 832, and 1326. One patient was a smoker with hypertension and hypercholesterolemia, while a second was a smoker with diabetes and a family history of CVD. Fishers exact test showed no statistically difference in the incidence of endpoints between NSCP and the background population [0.9% (95%CI: 0.1-2.9) versus 0.6% (95%CI: 0.2-1.3), p=0.64].

A further 211 patients were referred for cardiac testing at the time of index contact and were not included in this study. Of those, 152 had a cardiac CT, 26 were referred for coronary angiography, and 33 for myocardial perfusion scintigraphy. After one year of follow-up, two of these patients had UAP, two had an



1  
2  
3  
4 MI, and nine had coronary revascularization. No one had VT or died from cardiac related causes. In total, 11  
5 out of 211 patients [5.2% (95%CI: 2.8-8.9)] had an event, a rate that was significantly higher compared to  
6 the NSCP and background populations (p=0.001).  
7  
8  
9

## 10 Discussion

11 This is the first study to our knowledge to evaluate the role of non-contrast CT in an NSCP population.

12 We demonstrated that CAC can be detected in approximately half of patients with NSCP, a prevalence that  
13 does not differ significantly from what can be found in the general population. Furthermore, the prognosis  
14 for NSCP patients does not differ from the prognosis in an asymptomatic background population. However,  
15 a comparison of NSCP patients and a background population with those referred for cardiac investigation,  
16 showed that the latter group has a significantly higher rate of clinical events. As the CAC score in NSCP  
17 patients does not differ from the general population, we do not consider non-contrast CT scanning a useful  
18 risk stratification tool for NSCP patients. It appears to be of limited value for NSCP patients, and moreover  
19 may lead to increased downstream test utilization.  
20  
21  
22  
23  
24  
25  
26  
27

28 Laudon et al. (17) showed that in non-cardiac chest pain patients presenting to the ED and fulfilling the  
29 criteria for UAP, the prevalence of CAC is 49%, which is consistent with our findings in NSCP patients. In  
30 Laudon's study, non-cardiac chest pain patients with a CAC=0 had a 100% 5-year probability of event free  
31 survival. This was significantly better than for the cardiac related chest pain group, which implies that a  
32 non-contrast CT scan may be useful in discriminating between non-cardiac related and cardiac related chest  
33 pain. However, the study by Laudon et al. included patients fulfilling the criteria for unstable angina, who  
34 were scanned during index contact. Thus, this patient population was at higher risk of CVD compared with  
35 the patients in our study, who were not referred for further cardiac investigations after index contact.  
36  
37  
38  
39  
40  
41

42 The Society of Cardiovascular Computed Tomography Guidelines recommends referring patients for a  
43 coronary CT angiography (which also visualizes the arterial lumen) if they present to the emergency  
44 department with acute chest pain, a negative ECG, normal biomarkers, a low to intermediate pretest  
45 likelihood by risk stratification, and no identifiable coronary cause for their chest pain (18). In the present  
46 study, we found that patients who met these guideline criteria had a one-year event rate of 5%, as opposed  
47 to the approximately 1% one-year event rate found in NSCP patients for whom a clinical assessment does  
48 not suggest a need for additional diagnostic testing. While we did not perform CT angiography, we found  
49 that the presence of CAC in NSCP patients did not differ from the background population. Thus, clinical  
50 assessments, with respect to risk stratifying NSCP patients for further testing, appear to be accurate. The  
51  
52  
53  
54  
55  
56  
57  
58  
59  
60

1  
2  
3  
4 differences in characteristics between those referred for further investigations and those included in our  
5 study without referral at index contact were not, however, explored in this study.  
6  
7

8  
9 In our study, it was not possible to reach a conclusion on the prognostic value of CAC in predicting adverse  
10 cardiac events, largely due to the small number of study events, the short time to follow-up, and the small  
11 number of participants. However, it is worth noting that both of the patients in the NSCP study population  
12 who had clinical events had very high CAC scores (349 and 2595), and both had three risk factors for CVD  
13 (hypertension, hypercholesterolemia, and a family history of CVD). This finding agrees with previous studies  
14 that have demonstrated that a high CAC score is a major and independent CVD risk factor (19). In  
15 concordance with previous studies we found a very low event rate in patients without CAC (20). In the  
16 NSCP population no cardiac events among patients with a CAC=0 were observed, while one person in the  
17 background population had VT and a CAC=0.  
18  
19  
20  
21  
22  
23

24 The NSCP population included more patients with hypercholesterolemia compared with the background  
25 population (43% vs 18%). We know from previous studies that NSCP is associated with frequent contact  
26 with the health care system and higher medication use (21). This could partially explain why more patients  
27 in this group were diagnosed with hypercholesterolemia.  
28  
29  
30  
31

### 32 **Strengths /Limitations**

33  
34 The outcome data collected from the Danish registries are well documented and validated, which adds  
35 strength to this study (22, 23). The participants in this study and in the background population are likely  
36 healthier than the non-participants, with clinical trials involving the latter group demonstrating that they  
37 are at higher risk and have worse outcomes (24). The NSCP patients and the background population were  
38 preselected to exclude individuals without risk factors as well as those with known CAD or coronary  
39 angiography within the last 5 years. Thereby the results are not applicable to very low risk and high risk  
40 patients, for whom risk stratification is a less relevant element of care. We know from previous validation  
41 studies that the self-reported data for CVD is underreported and inaccurate compared to measured data  
42 (25, 26). A sensitivity of 84.5% has been shown for hypertension, hypercholesterolemia, and diabetes (25).  
43 This may have influenced the selection of our patients, since the presence of risk factors was an inclusion  
44 criteria. Patients who at index admission were referred for further investigations were not included in this  
45 study. They could have a higher prevalence of CAC that again would not be accounted for in this study.  
46  
47  
48  
49  
50  
51  
52  
53  
54  
55  
56  
57  
58  
59  
60

1  
2  
3  
4 The definition of risk factors varied between the study participants and the DanRisk comparator group.  
5 Family history was limited by age in the DanRisk study, whereas there was no age limit for NSCP patients.  
6 This may explain the higher proportion of patients with a family history of CAD among NSCP patients.  
7 Furthermore, the way that data was gathered differed: for NSCP patients the values were extracted from  
8 an acute setting, while in contrast the DanRisk patients were investigated in a baseline examination (i.e. the  
9 blood pressures were not obtained uniformly and thus not comparable).  
10  
11  
12

13  
14  
15 The scanners and protocols that were used in the two studies differed, and this may have affected  
16 measurements of presence of CAC. However, the centers and scanners used for the CAC assessment in the  
17 NSCP patients and background population were almost the same and comparable for that reason.  
18 Finally, the study was underpowered to show any differences in cardiac events. It is thus an observational  
19 study characterizing the prevalence of CAC in NSCP patients.  
20  
21  
22  
23

#### 24 **Conclusion**

25  
26 When adjusted for traditional CVD risk factors, the results of this study show that the presence of CAC in  
27 NSCP patients does not significantly differ significantly from a background population. Specifically, a little  
28 more than half of NSCP patients have detectable CAC on a cardiac CT scan. The prognosis for NSCP patients  
29 appears to no worse than a background population with a combined cardiac event rate of less than 1%.  
30  
31  
32  
33

#### 34 **Contributorship**

35 The steering committee (NI, HM, AL, AD, CBM) designed the trial. NI and CBM obtained funding. The  
36 investigators (JL, FH, RA, JB, NPS, MHG) trained the staff and gathered data. NI, AD, MHG and CBM analysed  
37 the data. NI, CBM, HM, AL and AD wrote the report. All authors can take responsibility for the integrity of  
38 the data and the accuracy of the data analysis, and all contributed to the implementation of the study, data  
39 interpretation, and approval of the final report for publication.  
40  
41  
42  
43

#### 44 **Data sharing**

45 No additional data is available.  
46  
47  
48

#### 49 **Conflicts of interest**

50  
51 All authors have completed the Unified Competing Interest form at [www.icmje.org/doi\\_disclosure.pdf](http://www.icmje.org/doi_disclosure.pdf)  
52 (available on request from the corresponding author) and declare that: (1) no authors have support from  
53 any company for the submitted work; (2) in the previous 3 years no authors had relationships with  
54  
55  
56  
57

1  
2  
3  
4 companies that might have an interest in the submitted work; (3) no authors have spouses, partners, or  
5 children who have a financial relationship that may be relevant to the submitted work; and (4) no authors  
6 have non-financial interests that may be relevant to the submitted work.  
7  
8  
9

### 10 **Figure legends**

11 Figure 1: Flowchart for the inclusion of NSCP patients

12 Figure 2: Flowchart for inclusion of the background population  
13  
14  
15

### 16 **Funding**

17  
18 This study was funded by the Region of southern Denmark, Hospital of Southern Denmark, The University  
19 of Southern Denmark and Knud and Edith Eriksens memory foundation.  
20  
21  
22

### 23 **Acknowledgement**

24 We are indebted to the staff involved in the project at the Department of Cardiology and Nuclear medicine,  
25 Odense University Hospital, the Department of Cardiology, Vejle Hospital, the Department of Cardiology  
26 and Radiology, Svendborg Hospital, and the Department of Cardiology, Hospital of Southern Denmark.  
27  
28  
29  
30  
31  
32  
33  
34  
35  
36  
37  
38  
39  
40  
41  
42  
43  
44  
45  
46  
47  
48  
49  
50  
51  
52  
53  
54  
55  
56  
57  
58  
59  
60

## References

1. Nichols M, Townsend N, Scarborough P, Rayner M. Cardiovascular disease in Europe 2014: epidemiological update. *Eur Heart J*. 2014;35(42):2950-9.
2. Fihn SD, Gardin JM, Abrams J, Berra K, Blankenship JC, Dallas AP, et al. 2012 ACCF/AHA/ACP/AATS/PCNA/SCAI/STS Guideline for the diagnosis and management of patients with stable ischemic heart disease: a report of the American College of Cardiology Foundation/American Heart Association Task Force on Practice Guidelines, and the American College of Physicians, American Association for Thoracic Surgery, Preventive Cardiovascular Nurses Association, Society for Cardiovascular Angiography and Interventions, and Society of Thoracic Surgeons. *J Am Coll Cardiol*. 2012;60(24):e44-e164.
3. Benjamin EJ, Blaha MJ, Chiuve SE, Cushman M, Das SR, Deo R, et al. Heart Disease and Stroke Statistics-2017 Update: A Report From the American Heart Association. *Circulation*. 2017;135(10):e146-e603.
4. Nowak R, Mueller C, Giannitsis E, Christ M, Ordonez-Llanos J, DeFilippi C, et al. High sensitivity cardiac troponin T in patients not having an acute coronary syndrome: results from the TRAPID-AMI study. *Biomarkers : biochemical indicators of exposure, response, and susceptibility to chemicals*. 2017:1-6.
5. Bhuiya FA, Pitts SR, McCaig LF. Emergency department visits for chest pain and abdominal pain: United States, 1999-2008. *NCHS data brief*. 2010(43):1-8.
6. Fass R, Achem SR. Noncardiac chest pain: epidemiology, natural course and pathogenesis. *Journal of neurogastroenterology and motility*. 2011;17(2):110-23.
7. Omstedt A, Hoijer J, Djarv T, Svensson P. Hypertension predicts major adverse cardiac events after discharge from the emergency department with unspecified chest pain. *Eur Heart J Acute Cardiovasc Care*. 2016;5(5):441-8.
8. Goodacre S, Cross E, Arnold J, Angelini K, Capewell S, Nicholl J. The health care burden of acute chest pain. *Heart*. 2005;91(2):229-30.
9. Khot UN, Khot MB, Bajzer CT, Sapp SK, Ohman EM, Brener SJ, et al. Prevalence of conventional risk factors in patients with coronary heart disease. *Jama*. 2003;290(7):898-904.
10. Agatston AS, Janowitz WR, Hildner FJ, Zusmer NR, Viamonte M, Jr., Detrano R. Quantification of coronary artery calcium using ultrafast computed tomography. *J Am Coll Cardiol*. 1990;15(4):827-32.
11. Messenger B, Li D, Nasir K, Carr JJ, Blankstein R, Budoff MJ. Coronary calcium scans and radiation exposure in the multi-ethnic study of atherosclerosis. *Int J Cardiovasc Imaging*. 2016;32(3):525-9.
12. Thygesen K, Alpert JS, Jaffe AS, Simoons ML, Chaitman BR, White HD. Third universal definition of myocardial infarction. *Nature reviews Cardiology*. 2012;9(11):620-33.
13. Montalescot G, Sechtem U, Achenbach S, Andreotti F, Arden C, Budaj A, et al. 2013 ESC guidelines on the management of stable coronary artery disease: the Task Force on the management of stable coronary artery disease of the European Society of Cardiology. *Eur Heart J*. 2013;34(38):2949-3003.
14. Budoff MJ, McClelland RL, Nasir K, Greenland P, Kronmal RA, Kondos GT, et al. Cardiovascular events with absent or minimal coronary calcification: the Multi-Ethnic Study of Atherosclerosis (MESA). *Am Heart J*. 2009;158(4):554-61.
15. Diederichsen AC, Sand NP, Norgaard B, Lambrechtsen J, Jensen JM, Munkholm H, et al. Discrepancy between coronary artery calcium score and HeartScore in middle-aged Danes: the DanRisk study. *Eur J Prev Cardiol*. 2012;19(3):558-64.
16. Budoff MJ, Diamond GA, Raggi P, Arad Y, Guerci AD, Callister TQ, et al. Continuous probabilistic prediction of angiographically significant coronary artery disease using electron beam tomography. *Circulation*. 2002;105(15):1791-6.
17. Laudon DA, Behrenbeck TR, Wood CM, Bailey KR, Callahan CM, Breen JF, et al. Computed tomographic coronary artery calcium assessment for evaluating chest pain in the emergency department: long-term outcome of a prospective blind study. *Mayo Clin Proc*. 2010;85(4):314-22.

18. Raff GL, Chinnaiyan KM, Cury RC, Garcia MT, Hecht HS, Hollander JE, et al. SCCT guidelines on the use of coronary computed tomographic angiography for patients presenting with acute chest pain to the emergency department: a report of the Society of Cardiovascular Computed Tomography Guidelines Committee. *Journal of cardiovascular computed tomography*. 2014;8(4):254-71.
19. Greenland P, LaBree L, Azen SP, Doherty TM, Detrano RC. Coronary artery calcium score combined with Framingham score for risk prediction in asymptomatic individuals. *Jama*. 2004;291(2):210-5.
20. Chaikriangkrai K, Palamaner Subash Shantha G, Jhun HY, Ungprasert P, Sigurdsson G, Nabi F, et al. Prognostic Value of Coronary Artery Calcium Score in Acute Chest Pain Patients Without Known Coronary Artery Disease: Systematic Review and Meta-analysis. *Annals of emergency medicine*. 2016.
21. Roll M, Rosenqvist M, Sjoborg B, Wettermark B. Unexplained acute chest pain in young adults: disease patterns and medication use 25 years later. *Psychosomatic medicine*. 2015;77(5):567-74.
22. Lynge E, Sandegaard JL, Rebolj M. The Danish National Patient Register. *Scandinavian journal of public health*. 2011;39(7 Suppl):30-3.
23. Pedersen CB. The Danish Civil Registration System. *Scandinavian journal of public health*. 2011;39(7 Suppl):22-5.
24. Bahit MC, Cannon CP, Antman EM, Murphy SA, Gibson CM, McCabe CH, et al. Direct comparison of characteristics, treatment, and outcomes of patients enrolled versus patients not enrolled in a clinical trial at centers participating in the TIMI 9 Trial and TIMI 9 Registry. *Am Heart J*. 2003;145(1):109-17.
25. Dey AK, Alyass A, Muir RT, Black SE, Swartz RH, Murray BJ, et al. Validity of Self-Report of Cardiovascular Risk Factors in a Population at High Risk for Stroke. *Journal of stroke and cerebrovascular diseases : the official journal of National Stroke Association*. 2015;24(12):2860-5.
26. Bowlin SJ, Morrill BD, Nafziger AN, Lewis C, Pearson TA. Reliability and changes in validity of self-reported cardiovascular disease risk factors using dual response: the behavioral risk factor survey. *J Clin Epidemiol*. 1996;49(5):511-7.

Figure 1: Flowchart for NSCP population inclusion

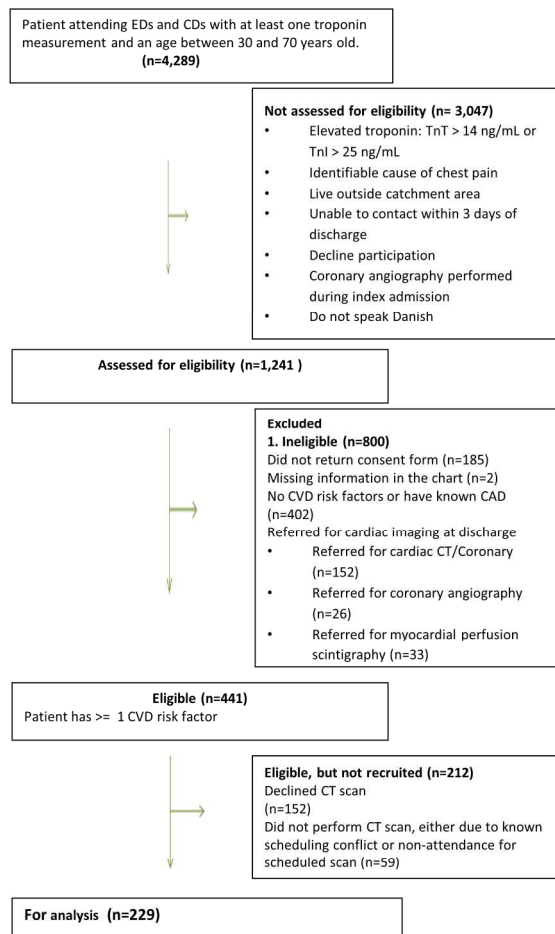

Figure 1: Flowchart for the inclusion of NSCP patients

254x338mm (300 x 300 DPI)

Figure 2: Flow chart for the DanRisk background comparator population

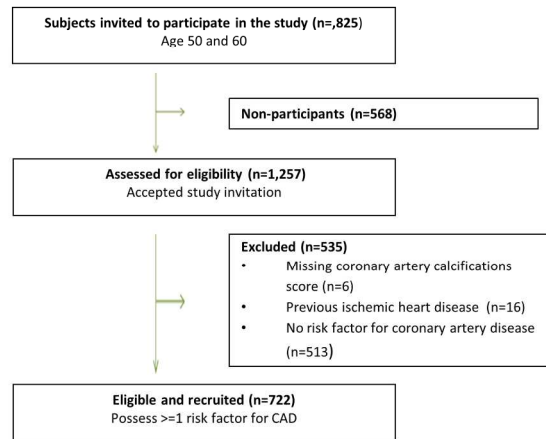

Figure 2: Flowchart for inclusion of the background population

254x338mm (300 x 300 DPI)



Multilogistic regression with B coefficients for CAC above 0 AU

|                                          | Coefficient | 95% CI       |
|------------------------------------------|-------------|--------------|
| Study population                         | -0,112      | -0.475-0.252 |
| Gender                                   | 1.00        | 0.716-1.291  |
| Age                                      | 0.096       | 0.070-0.121  |
| Current smoker                           | 0.734       | 0.370-1.098  |
| Previous smoker                          | 0.076       | -0.279-0.431 |
| Hypertension                             | 0.324       | 0.006-0.642  |
| Hypercholesterolemia                     | 0.571       | 0.221-0.921  |
| Diabetes Mellitus                        | 0.383       | -0.137-0.903 |
| Body Mass Index                          | 0.148       | -0.189-0.485 |
| Family history of cardiovascular disease | 0.257       | -0.041-0.554 |

Multilogistic regression with B coefficients for CAC above 99 AU

|                                          | Coefficient | 95% CI       |
|------------------------------------------|-------------|--------------|
| Study population                         | -0.052      | -0.516-0.412 |
| Male gender                              | 0.897       | 0.536-1.258  |
| Age                                      | 0.120       | 0.086-0.154  |
| Current smoker                           | 1.003       | 0.539-1.468  |
| Previous smoker                          | 0.172       | -0.298-0.641 |
| Hypertension                             | 0.755       | 0.366-1.144  |
| Hypercholesterolemia                     | 0.359       | -0.058-0.776 |
| Diabetes Mellitus                        | 0.534       | -0.032-1.101 |
| Body Mass Index                          | -0.026      | -0.470-0.417 |
| Family history of cardiovascular disease | 0.145       | -0.226-0.517 |

## STROBE Statement—checklist of items that should be included in reports of observational studies

|                              | Item No | Recommendation                                                                                                                                                                                                                                                                                                                                                                                                                                                                                                                                                                                                                                                                                              |
|------------------------------|---------|-------------------------------------------------------------------------------------------------------------------------------------------------------------------------------------------------------------------------------------------------------------------------------------------------------------------------------------------------------------------------------------------------------------------------------------------------------------------------------------------------------------------------------------------------------------------------------------------------------------------------------------------------------------------------------------------------------------|
| <b>Title and abstract</b>    | 1       | (a) Indicate the study's design with a commonly used term in the title or the abstract (Page 1)<br>(b) Provide in the abstract an informative and balanced summary of what was done and what was found (page 1)                                                                                                                                                                                                                                                                                                                                                                                                                                                                                             |
| <b>Introduction</b>          |         |                                                                                                                                                                                                                                                                                                                                                                                                                                                                                                                                                                                                                                                                                                             |
| Background/rationale         | 2       | Explain the scientific background and rationale for the investigation being reported (Page 2)                                                                                                                                                                                                                                                                                                                                                                                                                                                                                                                                                                                                               |
| Objectives                   | 3       | State specific objectives, including any prespecified hypotheses (Page 3)                                                                                                                                                                                                                                                                                                                                                                                                                                                                                                                                                                                                                                   |
| <b>Methods</b>               |         |                                                                                                                                                                                                                                                                                                                                                                                                                                                                                                                                                                                                                                                                                                             |
| Study design                 | 4       | Present key elements of study design early in the paper (Page 3)                                                                                                                                                                                                                                                                                                                                                                                                                                                                                                                                                                                                                                            |
| Setting                      | 5       | Describe the setting, locations, and relevant dates, including periods of recruitment, exposure, follow-up, and data collection (Page 3-6)                                                                                                                                                                                                                                                                                                                                                                                                                                                                                                                                                                  |
| Participants                 | 6       | (a) <i>Cohort study</i> —Give the eligibility criteria, and the sources and methods of selection of participants. Describe methods of follow-up (Page 3-4)<br><i>Case-control study</i> —Give the eligibility criteria, and the sources and methods of case ascertainment and control selection. Give the rationale for the choice of cases and controls<br><i>Cross-sectional study</i> —Give the eligibility criteria, and the sources and methods of selection of participants<br>(b) <i>Cohort study</i> —For matched studies, give matching criteria and number of exposed and unexposed<br><i>Case-control study</i> —For matched studies, give matching criteria and the number of controls per case |
| Variables                    | 7       | Clearly define all outcomes, exposures, predictors, potential confounders, and effect modifiers. Give diagnostic criteria, if applicable (Page 4)                                                                                                                                                                                                                                                                                                                                                                                                                                                                                                                                                           |
| Data sources/<br>measurement | 8*      | For each variable of interest, give sources of data and details of methods of assessment (measurement). Describe comparability of assessment methods if there is more than one group (Page 4-5)                                                                                                                                                                                                                                                                                                                                                                                                                                                                                                             |
| Bias                         | 9       | Describe any efforts to address potential sources of bias (Page 6)                                                                                                                                                                                                                                                                                                                                                                                                                                                                                                                                                                                                                                          |
| Study size                   | 10      | Explain how the study size was arrived at (Page 6)                                                                                                                                                                                                                                                                                                                                                                                                                                                                                                                                                                                                                                                          |
| Quantitative variables       | 11      | Explain how quantitative variables were handled in the analyses. If applicable, describe which groupings were chosen and why (Page 6)                                                                                                                                                                                                                                                                                                                                                                                                                                                                                                                                                                       |
| Statistical methods          | 12      | (a) Describe all statistical methods, including those used to control for confounding (Page 7)<br>(b) Describe any methods used to examine subgroups and interactions (Page 6-7)<br>(c) Explain how missing data were addressed (Page 4)<br>(d) <i>Cohort study</i> —If applicable, explain how loss to follow-up was addressed<br><i>Case-control study</i> —If applicable, explain how matching of cases and controls was addressed<br><i>Cross-sectional study</i> —If applicable, describe analytical methods taking account of sampling strategy<br>(e) Describe any sensitivity analyses                                                                                                              |

Continued on next page

**Results**

|                  |     |                                                                                                                                                                                                                                                                                                                                                                                                                                    |
|------------------|-----|------------------------------------------------------------------------------------------------------------------------------------------------------------------------------------------------------------------------------------------------------------------------------------------------------------------------------------------------------------------------------------------------------------------------------------|
| Participants     | 13* | (a) Report numbers of individuals at each stage of study—eg numbers potentially eligible, examined for eligibility, confirmed eligible, included in the study, completing follow-up, and analysed ( Page 7)<br>(b) Give reasons for non-participation at each stage ( Page 9)<br>(c) Consider use of a flow diagram (Page 9)                                                                                                       |
| Descriptive data | 14* | (a) Give characteristics of study participants (eg demographic, clinical, social) and information on exposures and potential confounders (Page 10)<br>(b) Indicate number of participants with missing data for each variable of interest (None, missing CAC not included in the study)<br>(c) <i>Cohort study</i> —Summarise follow-up time (eg, average and total amount) (Page 12)                                              |
| Outcome data     | 15* | <i>Cohort study</i> —Report numbers of outcome events or summary measures over time (Page 12-13)<br><i>Case-control study</i> —Report numbers in each exposure category, or summary measures of exposure<br><i>Cross-sectional study</i> —Report numbers of outcome events or summary measures                                                                                                                                     |
| Main results     | 16  | (a) Give unadjusted estimates and, if applicable, confounder-adjusted estimates and their precision (eg, 95% confidence interval). Make clear which confounders were adjusted for and why they were included (Page 12)<br>(b) Report category boundaries when continuous variables were categorized ( Page 12)<br>(c) If relevant, consider translating estimates of relative risk into absolute risk for a meaningful time period |
| Other analyses   | 17  | Report other analyses done—eg analyses of subgroups and interactions, and sensitivity analyses (Page 13)                                                                                                                                                                                                                                                                                                                           |

**Discussion**

|                  |    |                                                                                                                                                                                         |
|------------------|----|-----------------------------------------------------------------------------------------------------------------------------------------------------------------------------------------|
| Key results      | 18 | Summarise key results with reference to study objectives (Page 14)                                                                                                                      |
| Limitations      | 19 | Discuss limitations of the study, taking into account sources of potential bias or imprecision. Discuss both direction and magnitude of any potential bias (Page 15)                    |
| Interpretation   | 20 | Give a cautious overall interpretation of results considering objectives, limitations, multiplicity of analyses, results from similar studies, and other relevant evidence (Page 14-15) |
| Generalisability | 21 | Discuss the generalisability (external validity) of the study results (Page 16)                                                                                                         |

**Other information**

|         |    |                                                                                                                                                                         |
|---------|----|-------------------------------------------------------------------------------------------------------------------------------------------------------------------------|
| Funding | 22 | Give the source of funding and the role of the funders for the present study and, if applicable, for the original study on which the present article is based (Page 17) |
|---------|----|-------------------------------------------------------------------------------------------------------------------------------------------------------------------------|

\*Give information separately for cases and controls in case-control studies and, if applicable, for exposed and unexposed groups in cohort and cross-sectional studies.

**Note:** An Explanation and Elaboration article discusses each checklist item and gives methodological background and published examples of transparent reporting. The STROBE checklist is best used in conjunction with this article (freely available on the Web sites of PLoS Medicine at <http://www.plosmedicine.org/>, Annals of Internal Medicine at <http://www.annals.org/>, and Epidemiology at <http://www.epidem.com/>). Information on the STROBE Initiative is available at [www.strobe-statement.org](http://www.strobe-statement.org).
