# Supplementary material for: Prevalence of coronary artery calcification in a non-specific chest pain population in emergency and cardiology departments compared with the background population: a prospective cohort study in Southern Denmark with 12-month follow-up of cardiac endpoints
Source: PubMed Central journal article supplement — BMJ Open. 2018 Mar 3;8(3):e018391. doi: 10.1136/bmjopen-2017-018391 (PMC5855253; doi:10.1136/bmjopen-2017-018391), 2018-03-03
Supplement: bmjopen-2017-018391supp001.pdf [file bmjopen-2017-018391supp001.pdf]

Multilogistic regression with B coefficients for CAC above 0 AU

|                                          | Coefficient | 95% CI       |
|------------------------------------------|-------------|--------------|
| Study population                         | -0,112      | -0.475-0.252 |
| Gender                                   | 1.00        | 0.716-1.291  |
| Age                                      | 0.096       | 0.070-0.121  |
| Current smoker                           | 0.734       | 0.370-1.098  |
| Previous smoker                          | 0.076       | -0.279-0.431 |
| Hypertension                             | 0.324       | 0.006-0.642  |
| Hypercholesterolemia                     | 0.571       | 0.221-0.921  |
| Diabetes Mellitus                        | 0.383       | -0.137-0.903 |
| Body Mass Index                          | 0.148       | -0.189-0.485 |
| Family history of cardiovascular disease | 0.257       | -0.041-0.554 |

Multilogistic regression with B coefficients for CAC above 99 AU

|                                          | Coefficient | 95% CI       |
|------------------------------------------|-------------|--------------|
| Study population                         | -0.052      | -0.516-0.412 |
| Male gender                              | 0.897       | 0.536-1.258  |
| Age                                      | 0.120       | 0.086-0.154  |
| Current smoker                           | 1.003       | 0.539-1.468  |
| Previous smoker                          | 0.172       | -0.298-0.641 |
| Hypertension                             | 0.755       | 0.366-1.144  |
| Hypercholesterolemia                     | 0.359       | -0.058-0.776 |
| Diabetes Mellitus                        | 0.534       | -0.032-1.101 |
| Body Mass Index                          | -0.026      | -0.470-0.417 |
| Family history of cardiovascular disease | 0.145       | -0.226-0.517 |
